# Supplementary material for: Differences in psychologists’ cognitive traits are associated with scientific divides
Source: Springer Nature journal article supplement (doi:10.1038/s41562-025-02153-1), 2025-04-17
Supplement: MOESM1 [file 41562_2025_2153_MOESM1_ESM.pdf › 41562_2025_2153_MOESM1_ESM.pdf]

---

# Differences in psychologists' cognitive traits are associated with scientific divides

---

In the format provided by the  
authors and unedited

## **Supplementary Materials: Contents**

|                   |                                                             |           |
|-------------------|-------------------------------------------------------------|-----------|
| <b>Appendix 1</b> | <b>Bayesian models of responses to controversial themes</b> | <b>2</b>  |
| <b>Appendix 2</b> | <b>Extended regression outputs</b>                          | <b>6</b>  |
| <b>Appendix 3</b> | <b>Additional details on the bibliometric models</b>        | <b>37</b> |
| <b>Appendix 4</b> | <b>Structural equation models</b>                           | <b>38</b> |
| <b>Appendix 5</b> | <b>Robustness checks</b>                                    | <b>43</b> |
| <b>References</b> |                                                             | <b>45</b> |

## Appendix 1 Bayesian models of responses to controversial themes

To model the distributions of responses shown in Figure 1 of the main text, we developed custom Bayesian models to account for various idiosyncratic features of the data:

- The response format was a percentage scale, so responses map onto the range  $[0, 1]$ . Beta regressions are apt for modeling data in  $(0, 1)$  so they are an obvious choice here, but as they cannot model 0s or 1s, this necessitates additional model components (‘inflation’ components) for responses at either extreme end of the scale.
- Additionally, a number of themes showed a spike at exactly 50%, which represents a distinctive response strategy: Participants had to move the slider to progress to the next item in the survey, so if they wanted to answer exactly 50% rather than some number near 50% (perhaps to avoid making a choice, no matter how trivial, for either left- or right-wards movement), this necessitated moving the slider off the mid-point where it was initially, then moving it back to 50%. We thus included an additional inflation component for responses exactly at the mid-point.
- Many of the themes showed a bimodal response pattern, so all responses that were not one of the unique strategies above (i.e., everything not at 0, 0.5 or 1) were handled with a mixture model. This estimated parameters for two Beta distributions, each representing one of two latent groups in the data.

Thus, each theme is modeled as a combination of inflation components (0, 1 or 0.5, highlighted with lighter blue in Figure 1 and mixture components (everything else, shown in darker blue in Figure 1). The Stan code for these custom models is available at <https://osf.io/zyec9/>.

Supplementary Table 1 shows the model estimates. Below we show how the table contents correspond to the above points and illustrate how to interpret the estimates using the first theme below (‘Rational self-interest’) as an example.

For each theme, the first inflation component is a logistic model of how many participants responded at *either* end of the scale. As parameter ‘Zero or one’ is a proportion, the value 0.144 implies that 14.4% of participants moved the slider all the way to the right *or* to the left of the scale for theme ‘Rational self-interest’.

Conditional on having moved the slider to either extreme, the next component is a logistic model how many extreme responses that were at the upper rather than the lower extreme. As parameter ‘Conditional one’ is a proportion, the estimate 0.028 means that 2.8% of extreme responses were 1s, representing full agreement with the upper anchor label for ‘Rational self-interest’ in Table Supplementary Table 1. In turn, this implies that 97.2% ( $1 - 0.028 = 0.972$ ) of extreme responses were 0s, representing full agreement with the lower anchor label in Supplementary Table 1.

Conditional on *not* having moved the slider to either extreme, the next component is a logistic model of how many responses were at 50%. Again, as parameter ‘Mid’ is a

proportion, the estimate 0.027 means that 2.7% of non-extreme participants purposefully chose the exact mid-point for ‘Rational self-interest’.

The remaining components are mixture components, modeling all non-inflation responses (everything other than 0, 0.5 or 1) as a mixture of two latent groups. Column ‘Proportion’ shows the estimated proportion of responses falling into each group (model  $\theta$ ). Thus, 74.8% of non-inflation responses were in Group 1 and 25.2% were in Group 2.

Each latent group is modeled as a Beta distribution with a mean (a percentage-response transformation of the model’s logistic  $\mu$  parameter) and a precision parameter (model  $\phi$ ). Thus, the mean response for the first latent group was 20.7% on the response scale and for the second latent group it was 63.5%.

Supplementary Table 1: Estimated parameters (with 95% Credibility Intervals) from Bayesian models of responses to each controversial theme.

| Theme                  | Component            | Group | Proportion           | Parameter       | Estimate (95%CIs)     |
|------------------------|----------------------|-------|----------------------|-----------------|-----------------------|
| Rational self-interest | Inflation            | 1     | 0.748 [0.72, 0.772]  | Zero or one     | 0.144 [0.138, 0.15]   |
|                        |                      |       |                      | Conditional one | 0.028 [0.02, 0.036]   |
|                        |                      |       |                      | Mid             | 0.027 [0.024, 0.031]  |
|                        | Mixture              |       |                      | Mean            | 0.207 [0.2, 0.214]    |
|                        |                      |       |                      | Precision       | 9.477 [8.899, 10.094] |
|                        |                      |       |                      | 2               | 0.252 [0.228, 0.28]   |
| Precision              | 7.325 [6.168, 8.484] |       |                      |                 |                       |
| Computer analogy       | Inflation            | 1     | 0.58 [0.473, 0.678]  |                 |                       |
|                        |                      |       |                      | Conditional one | 0.04 [0.03, 0.05]     |
|                        |                      |       |                      | Mid             | 0.047 [0.043, 0.051]  |
|                        | Mixture              |       |                      | Mean            | 0.206 [0.196, 0.218]  |
|                        |                      |       |                      | Precision       | 9.748 [8.913, 10.686] |
|                        |                      |       |                      | 2               | 0.252 [0.228, 0.28]   |
| Precision              | 7.325 [6.168, 8.484] |       |                      |                 |                       |
| Neurobiology essential | Inflation            | 1     | 0.701 [0.676, 0.723] |                 |                       |
|                        |                      |       |                      | Conditional one | 0.82 [0.069, 0.095]   |
|                        |                      |       |                      | Mid             | 0.037 [0.034, 0.041]  |
|                        | Mixture              |       |                      | Mean            | 0.222 [0.215, 0.229]  |
|                        |                      |       |                      | Precision       | 8.757 [8.222, 9.333]  |
|                        |                      |       |                      | 2               | 0.299 [0.277, 0.324]  |
| Precision              | 6.573 [5.667, 7.479] |       |                      |                 |                       |
| Perception veridical   | Inflation            | 1     | 0.608 [0.537, 0.667] |                 |                       |
|                        |                      |       |                      | Conditional one | 0.081 [0.065, 0.099]  |
|                        |                      |       |                      | Mid             | 0.064 [0.059, 0.069]  |
|                        | Mixture              |       |                      | Mean            | 0.24 [0.227, 0.253]   |
|                        |                      |       |                      | Precision       | 9.388 [8.581, 10.227] |
|                        |                      |       |                      | 2               | 0.392 [0.333, 0.463]  |
| Precision              | 5.84 [4.813, 6.946]  |       |                      |                 |                       |
| Wide reach             | Inflation            | 1     | 0.775 [0.755, 0.793] |                 |                       |
|                        |                      |       |                      | Conditional one | 0.153 [0.133, 0.173]  |
|                        |                      |       |                      | Mid             | 0.044 [0.04, 0.048]   |
|                        | Mixture              |       |                      | Mean            | 0.279 [0.271, 0.287]  |
|                        |                      |       |                      | Precision       | 6.663 [6.273, 7.081]  |
|                        |                      |       |                      | 2               | 0.225 [0.228, 0.28]   |
| Precision              | 7.325 [6.168, 8.484] |       |                      |                 |                       |

|                    |           |   |                      |                 |        |                  |
|--------------------|-----------|---|----------------------|-----------------|--------|------------------|
| Math models        | Inflation |   |                      | Zero or one     | 0.092  | [0.087, 0.98]    |
|                    |           |   |                      | Conditional one | 0.248  | [0.222, 0.275]   |
|                    |           |   |                      | Mid             | 0.058  | [0.053, 0.062]   |
|                    | Mixture   | 1 | 0.505 [0.469, 0.539] | Mean            | 0.243  | [0.231, 0.255]   |
|                    |           |   |                      | Precision       | 9.01   | [8.217, 9.81]    |
|                    |           | 2 | 0.495 [0.461, 0.531] | Mean            | 0.652  | [0.633, 0.669]   |
| Evolution matters  | Inflation |   |                      | Precision       | 6.509  | [5.808, 7.234]   |
|                    |           |   |                      | Zero or one     | 0.066  | [0.061, 0.07]    |
|                    |           |   |                      | Conditional one | 0.454  | [0.418, 0.49]    |
|                    | Mixture   |   |                      | Mid             | 0.102  | [0.097, 0.108]   |
|                    |           | 1 | 0.509 [0.026, 0.991] | Mean            | 0.464  | [0.421, 0.489]   |
|                    |           |   |                      | Precision       | 3.282  | [2.364, 3.685]   |
| Capacities innate  | Inflation | 2 | 0.491 [0.009, 0.974] | Mean            | 0.52   | [0.487, 0.604]   |
|                    |           |   |                      | Precision       | 3.479  | [1.912, 4.406]   |
|                    |           |   |                      | Zero or one     | 0.042  | [0.038, 0.046]   |
|                    | Mixture   |   |                      | Conditional one | 0.54   | [0.495, 0.584]   |
|                    |           |   |                      | Mid             | 0.106  | [0.101, 0.112]   |
|                    |           | 1 | 0.548 [0.096, 0.995] | Mean            | 0.44   | [0.288, 0.502]   |
| Ideal rules        | Inflation |   |                      | Precision       | 4.414  | [3.171, 7.906]   |
|                    |           |   |                      | Mean            | 0.557  | [0.501, 0.663]   |
|                    |           |   |                      | Precision       | 3.757  | [1.642, 5.963]   |
|                    | Mixture   |   |                      | Zero or one     | 0.028  | [0.025, 0.31]    |
|                    |           |   |                      | Conditional one | 0.504  | [0.449, 0.558]   |
|                    |           |   |                      | Mid             | 0.188  | [0.181, 0.196]   |
| Constructs real    | Inflation | 1 | 0.311 [0.005, 0.994] | Mean            | 0.465  | [0.396, 0.507]   |
|                    |           |   |                      | Precision       | 3.18   | [1.358, 4.346]   |
|                    |           | 2 | 0.689 [0.006, 0.995] | Mean            | 0.524  | [0.505, 0.573]   |
|                    | Mixture   |   |                      | Precision       | 4.029  | [1.515, 4.839]   |
|                    |           |   |                      | Zero or one     | 0.058  | [0.053, 0.062]   |
|                    |           |   |                      | Conditional one | 0.446  | [0.408, 0.484]   |
| Personality stable | Inflation |   |                      | Mid             | 0.031  | [0.028, 0.033]   |
|                    |           |   |                      | Mean            | 0.312  | [0.299, 0.326]   |
|                    |           |   |                      | Precision       | 7.794  | [6.887, 8.328]   |
|                    | Mixture   | 1 | 0.481 [0.454, 0.508] | Mean            | 0.721  | [0.711, 0.731]   |
|                    |           |   |                      | Precision       | 9.237  | [8.526, 9.964]   |
|                    |           | 2 | 0.519 [0.492, 0.546] | Zero or one     | 0.024  | [0.021, 0.027]   |
| Mind universal     | Inflation |   |                      | Conditional one | 0.353  | [0.298, 0.41]    |
|                    |           |   |                      | Mid             | 0.043  | [0.04, 0.047]    |
|                    |           |   |                      | Mean            | 0.336  | [0.324, 0.35]    |
|                    | Mixture   | 1 | 0.432 [0.408, 0.458] | Precision       | 9.301  | [8.349, 10.243]  |
|                    |           |   |                      | Mean            | 0.699  | [0.692, 0.706]   |
|                    |           | 2 | 0.568 [0.542, 0.592] | Precision       | 12.397 | [11.585, 13.212] |
| Holistic view      | Inflation |   |                      | Zero or one     | 0.032  | [0.029, 0.036]   |
|                    |           |   |                      | Conditional one | 0.625  | [0.577, 0.672]   |
|                    |           |   |                      | Mid             | 0.067  | [0.062, 0.072]   |
|                    | Mixture   | 1 | 0.664 [0.573, 0.737] | Mean            | 0.511  | [0.491, 0.527]   |
|                    |           |   |                      | Precision       | 3.745  | [3.586, 3.992]   |
|                    |           | 2 | 0.336 [0.263, 0.427] | Mean            | 0.675  | [0.662, 0.687]   |

|                   |           |                      |                      |                      |                 |                |
|-------------------|-----------|----------------------|----------------------|----------------------|-----------------|----------------|
| Thinking~language | Mixture   | 1                    | 0.536 [0.355, 0.691] | Mid                  | 0.117           | [0.111, 0.123] |
|                   |           |                      |                      | Mean                 | 0.498           | [0.434, 0.537] |
|                   |           |                      |                      | Precision            | 3.933           | [3.53, 4.622]  |
|                   |           | 2                    | 0.464 [0.309, 0.645] | Mean                 | 0.671           | [0.647, 0.695] |
|                   |           |                      |                      | Precision            | 6.758           | [5.766, 8.186] |
|                   |           |                      |                      | Zero or one          | 0.055           | [0.051, 0.059] |
|                   | Inflation |                      |                      | Conditional one      | 0.841           | [0.812, 0.869] |
|                   |           |                      |                      | Mid                  | 0.052           | [0.048, 0.056] |
|                   |           |                      |                      | Mean                 | 0.364           | [0.327, 0.414] |
|                   | Mixture   | 1                    | 0.302 [0.25, 0.375]  | Precision            | 7.13            | [5.566, 8.709] |
|                   |           |                      |                      | Mean                 | 0.724           | [0.711, 0.739] |
|                   |           |                      |                      | Precision            | 8.427           | [7.735, 9.178] |
| Context matters   | Inflation |                      |                      | Zero or one          | 0.058           | [0.054, 0.063] |
|                   |           |                      |                      | Conditional one      | 0.929           | [0.908, 0.947] |
|                   |           |                      |                      | Mid                  | 0.076           | [0.071, 0.081] |
|                   | Mixture   | 1                    | 0.236 [0.153, 0.414] | Mean                 | 0.434           | [0.352, 0.576] |
|                   |           |                      |                      | Precision            | 6.126           | [3.545, 8.616] |
|                   |           |                      |                      | Mean                 | 0.754           | [0.745, 0.765] |
|                   | 2         | 0.764 [0.586, 0.847] | Precision            | 10.375               | [9.423, 12.188] |                |
|                   |           |                      | Zero or one          | 0.138                | [0.132, 0.145]  |                |
|                   |           |                      | Conditional one      | 0.958                | [0.948, 0.967]  |                |
|                   | Inflation |                      |                      | Mid                  | 0.041           | [0.038, 0.046] |
|                   |           |                      |                      | Mean                 | 0.5             | [0.435, 0.554] |
|                   |           |                      |                      | Precision            | 3.977           | [3.339, 4.925] |
| Mixture           | 1         | 0.288 [0.219, 0.356] | Mean                 | 0.798                | [0.79, 0.805]   |                |
|                   |           |                      | Precision            | 9.432                | [8.806, 10.076] |                |
|                   |           |                      | 2                    | 0.712 [0.644, 0.781] |                 |                |

## Appendix 2 Extended regression outputs

The first four tables in this section present the model outputs for controversial themes regressed on research areas (Supplementary Table 2), research methods (Supplementary Table 3), cognitive traits (Supplementary Table 4) and gender (Supplementary Table 5). These are summarized in Fig. 3 of the main text, with a subset of the cognitive trait results (for tolerance of ambiguity) also appearing in Fig. 2. Unlike in the previous Appendix, ‘CIs’ here represent frequentist confidence intervals. Next is a similar table for research areas regressed on research methods, corresponding to Extended Data Figure 4.

Following that is a table of regression coefficients for latent theme factor scores as a function of cognitive traits (Supplementary Table 7), which are summarized in Fig. 6b of the main text.

Supplementary Table 2: Regression coefficients for controversial themes as a function of research area (each a separate regression model). Results correspond to Fig. 3a in the main text. Regression coefficients (b) represent logits, with the outcome (theme) standardized. P-values in gray reflect cases that failed to meet the Bonferroni-adjusted significance threshold discussed in the main text ( $p < .000208$ ).

| Theme                  | Research area         | Coefficient (b) | CIs              | t      | p         |
|------------------------|-----------------------|-----------------|------------------|--------|-----------|
| Constructs real        | Biopsych              | 0.172           | [0.095, 0.249]   | 4.398  | <2.08e-04 |
| Thinking language      | Biopsych              | -0.184          | [-0.261, -0.107] | -4.707 | <2.08e-04 |
| Math models            | Biopsych              | 0.197           | [0.12, 0.273]    | 5.031  | <2.08e-04 |
| Wide reach             | Biopsych              | 0.069           | [-0.008, 0.146]  | 1.763  | 0.078     |
| Rational self-interest | Biopsych              | 0.051           | [-0.026, 0.128]  | 1.298  | 0.194     |
| Neurobiology essential | Biopsych              | 0.712           | [0.637, 0.787]   | 18.570 | <2.08e-04 |
| Holistic view          | Biopsych              | -0.059          | [-0.136, 0.017]  | -1.514 | 0.130     |
| Personality stable     | Biopsych              | 0.122           | [0.045, 0.199]   | 3.119  | 0.002     |
| Context matters        | Biopsych              | -0.067          | [-0.143, 0.01]   | -1.704 | 0.088     |
| Capacities innate      | Biopsych              | 0.099           | [0.023, 0.176]   | 2.540  | 0.011     |
| Ideal rules            | Biopsych              | 0.050           | [-0.027, 0.127]  | 1.276  | 0.202     |
| Evolution matters      | Biopsych              | 0.297           | [0.22, 0.373]    | 7.612  | <2.08e-04 |
| Computer analogy       | Biopsych              | -0.133          | [-0.21, -0.056]  | -3.402 | 0.001     |
| Mind universal         | Biopsych              | 0.107           | [0.03, 0.184]    | 2.737  | 0.006     |
| Social environment     | Biopsych              | -0.246          | [-0.323, -0.17]  | -6.303 | <2.08e-04 |
| Perception veridical   | Biopsych              | -0.095          | [-0.172, -0.018] | -2.422 | 0.015     |
| Constructs real        | Clinical/health psych | -0.085          | [-0.134, -0.035] | -3.351 | 0.001     |
| Thinking language      | Clinical/health psych | 0.063           | [0.014, 0.113]   | 2.504  | 0.012     |
| Math models            | Clinical/health psych | -0.103          | [-0.153, -0.054] | -4.103 | <2.08e-04 |
| Wide reach             | Clinical/health psych | -0.129          | [-0.179, -0.08]  | -5.127 | <2.08e-04 |
| Rational self-interest | Clinical/health psych | 0.133           | [0.084, 0.182]   | 5.280  | <2.08e-04 |
| Neurobiology essential | Clinical/health psych | -0.092          | [-0.141, -0.042] | -3.634 | <0.001    |
| Holistic view          | Clinical/health psych | 0.149           | [0.1, 0.199]     | 5.933  | <2.08e-04 |
| Personality stable     | Clinical/health psych | 0.083           | [0.033, 0.132]   | 3.281  | 0.001     |
| Context matters        | Clinical/health psych | -0.024          | [-0.074, 0.025]  | -0.964 | 0.335     |
| Capacities innate      | Clinical/health psych | 0.029           | [-0.02, 0.079]   | 1.165  | 0.244     |

Supplementary Table 2: Regression coefficients, research areas (*continued*)

| Theme                  | Research area            | Coefficient (b) | CIs              | t       | p         |
|------------------------|--------------------------|-----------------|------------------|---------|-----------|
| Ideal rules            | Clinical/health psych    | -0.137          | [-0.187, -0.088] | -5.441  | <2.08e-04 |
| Evolution matters      | Clinical/health psych    | -0.004          | [-0.054, 0.045]  | -0.173  | 0.863     |
| Computer analogy       | Clinical/health psych    | 0.036           | [-0.013, 0.086]  | 1.445   | 0.149     |
| Mind universal         | Clinical/health psych    | -0.158          | [-0.207, -0.108] | -6.256  | <2.08e-04 |
| Social environment     | Clinical/health psych    | 0.254           | [0.205, 0.303]   | 10.131  | <2.08e-04 |
| Perception veridical   | Clinical/health psych    | -0.136          | [-0.186, -0.087] | -5.405  | <2.08e-04 |
| Constructs real        | Cog neurosci             | 0.114           | [0.055, 0.172]   | 3.821   | <2.08e-04 |
| Thinking language      | Cog neurosci             | -0.164          | [-0.223, -0.106] | -5.521  | <2.08e-04 |
| Math models            | Cog neurosci             | 0.386           | [0.328, 0.444]   | 13.088  | <2.08e-04 |
| Wide reach             | Cog neurosci             | 0.064           | [0.005, 0.122]   | 2.145   | 0.032     |
| Rational self-interest | Cog neurosci             | -0.058          | [-0.116, 0.001]  | -1.943  | 0.052     |
| Neurobiology essential | Cog neurosci             | 0.753           | [0.697, 0.809]   | 26.333  | <2.08e-04 |
| Holistic view          | Cog neurosci             | -0.206          | [-0.265, -0.148] | -6.945  | <2.08e-04 |
| Personality stable     | Cog neurosci             | 0.032           | [-0.027, 0.09]   | 1.065   | 0.287     |
| Context matters        | Cog neurosci             | -0.116          | [-0.175, -0.058] | -3.906  | <2.08e-04 |
| Capacities innate      | Cog neurosci             | 0.041           | [-0.017, 0.1]    | 1.380   | 0.168     |
| Ideal rules            | Cog neurosci             | 0.204           | [0.146, 0.262]   | 6.866   | <2.08e-04 |
| Evolution matters      | Cog neurosci             | 0.185           | [0.127, 0.243]   | 6.227   | <2.08e-04 |
| Computer analogy       | Cog neurosci             | -0.039          | [-0.097, 0.02]   | -1.294  | 0.196     |
| Mind universal         | Cog neurosci             | 0.217           | [0.159, 0.275]   | 7.302   | <2.08e-04 |
| Social environment     | Cog neurosci             | -0.593          | [-0.65, -0.536]  | -20.420 | <2.08e-04 |
| Perception veridical   | Cog neurosci             | -0.024          | [-0.083, 0.034]  | -0.817  | 0.414     |
| Constructs real        | Cognitive psych          | 0.177           | [0.129, 0.226]   | 7.201   | <2.08e-04 |
| Thinking language      | Cognitive psych          | -0.078          | [-0.127, -0.03]  | -3.165  | 0.002     |
| Math models            | Cognitive psych          | 0.327           | [0.279, 0.375]   | 13.367  | <2.08e-04 |
| Wide reach             | Cognitive psych          | 0.076           | [0.027, 0.124]   | 3.073   | 0.002     |
| Rational self-interest | Cognitive psych          | -0.093          | [-0.142, -0.045] | -3.775  | <2.08e-04 |
| Neurobiology essential | Cognitive psych          | 0.141           | [0.093, 0.189]   | 5.720   | <2.08e-04 |
| Holistic view          | Cognitive psych          | -0.282          | [-0.33, -0.234]  | -11.491 | <2.08e-04 |
| Personality stable     | Cognitive psych          | -0.029          | [-0.078, 0.019]  | -1.178  | 0.239     |
| Context matters        | Cognitive psych          | -0.083          | [-0.131, -0.034] | -3.348  | 0.001     |
| Capacities innate      | Cognitive psych          | 0.056           | [0.008, 0.105]   | 2.280   | 0.023     |
| Ideal rules            | Cognitive psych          | 0.236           | [0.188, 0.284]   | 9.606   | <2.08e-04 |
| Evolution matters      | Cognitive psych          | 0.063           | [0.015, 0.112]   | 2.556   | 0.011     |
| Computer analogy       | Cognitive psych          | 0.119           | [0.071, 0.168]   | 4.837   | <2.08e-04 |
| Mind universal         | Cognitive psych          | 0.327           | [0.279, 0.375]   | 13.372  | <2.08e-04 |
| Social environment     | Cognitive psych          | -0.547          | [-0.594, -0.5]   | -22.844 | <2.08e-04 |
| Perception veridical   | Cognitive psych          | 0.092           | [0.043, 0.14]    | 3.708   | <0.001    |
| Constructs real        | Comparative/animal behav | 0.032           | [-0.086, 0.15]   | 0.533   | 0.594     |
| Thinking language      | Comparative/animal behav | -0.399          | [-0.517, -0.281] | -6.644  | <2.08e-04 |
| Math models            | Comparative/animal behav | 0.109           | [-0.009, 0.227]  | 1.815   | 0.070     |
| Wide reach             | Comparative/animal behav | 0.164           | [0.046, 0.282]   | 2.732   | 0.006     |
| Rational self-interest | Comparative/animal behav | -0.025          | [-0.143, 0.094]  | -0.407  | 0.684     |
| Neurobiology essential | Comparative/animal behav | 0.446           | [0.328, 0.564]   | 7.431   | <2.08e-04 |



Supplementary Table 2: Regression coefficients, research areas (*continued*)

| Theme                  | Research area            | Coefficient (b) | CIs              | t      | p         |
|------------------------|--------------------------|-----------------|------------------|--------|-----------|
| Holistic view          | Comparative/animal behav | -0.044          | [-0.162, 0.074]  | -0.728 | 0.467     |
| Personality stable     | Comparative/animal behav | -0.018          | [-0.136, 0.1]    | -0.301 | 0.763     |
| Context matters        | Comparative/animal behav | -0.062          | [-0.18, 0.056]   | -1.028 | 0.304     |
| Capacities innate      | Comparative/animal behav | 0.108           | [-0.01, 0.226]   | 1.789  | 0.074     |
| Ideal rules            | Comparative/animal behav | 0.137           | [0.019, 0.255]   | 2.280  | 0.023     |
| Evolution matters      | Comparative/animal behav | 0.778           | [0.661, 0.895]   | 13.058 | <2.08e-04 |
| Computer analogy       | Comparative/animal behav | -0.143          | [-0.261, -0.025] | -2.383 | 0.017     |
| Mind universal         | Comparative/animal behav | 0.166           | [0.048, 0.284]   | 2.762  | 0.006     |
| Social environment     | Comparative/animal behav | -0.293          | [-0.411, -0.175] | -4.877 | <2.08e-04 |
| Perception veridical   | Comparative/animal behav | -0.150          | [-0.268, -0.032] | -2.490 | 0.013     |
| Constructs real        | Counseling               | -0.285          | [-0.372, -0.197] | -6.367 | <2.08e-04 |
| Thinking language      | Counseling               | 0.066           | [-0.022, 0.154]  | 1.479  | 0.139     |
| Math models            | Counseling               | -0.308          | [-0.396, -0.221] | -6.895 | <2.08e-04 |
| Wide reach             | Counseling               | -0.142          | [-0.23, -0.054]  | -3.171 | 0.002     |
| Rational self-interest | Counseling               | 0.140           | [0.052, 0.228]   | 3.129  | 0.002     |
| Neurobiology essential | Counseling               | -0.213          | [-0.301, -0.125] | -4.757 | <2.08e-04 |
| Holistic view          | Counseling               | 0.105           | [0.017, 0.193]   | 2.348  | 0.019     |
| Personality stable     | Counseling               | -0.150          | [-0.237, -0.062] | -3.340 | 0.001     |
| Context matters        | Counseling               | 0.103           | [0.015, 0.191]   | 2.300  | 0.021     |
| Capacities innate      | Counseling               | -0.083          | [-0.171, 0.004]  | -1.861 | 0.063     |
| Ideal rules            | Counseling               | -0.227          | [-0.315, -0.139] | -5.069 | <2.08e-04 |
| Evolution matters      | Counseling               | 0.031           | [-0.057, 0.119]  | 0.687  | 0.492     |
| Computer analogy       | Counseling               | -0.064          | [-0.152, 0.024]  | -1.424 | 0.154     |
| Mind universal         | Counseling               | -0.280          | [-0.368, -0.192] | -6.263 | <2.08e-04 |
| Social environment     | Counseling               | 0.350           | [0.262, 0.437]   | 7.831  | <2.08e-04 |
| Perception veridical   | Counseling               | -0.016          | [-0.104, 0.072]  | -0.352 | 0.725     |
| Constructs real        | Developmental psych      | -0.065          | [-0.119, -0.011] | -2.369 | 0.018     |
| Thinking language      | Developmental psych      | 0.141           | [0.087, 0.195]   | 5.123  | <2.08e-04 |
| Math models            | Developmental psych      | -0.100          | [-0.154, -0.046] | -3.634 | <0.001    |
| Wide reach             | Developmental psych      | 0.002           | [-0.052, 0.056]  | 0.071  | 0.944     |
| Rational self-interest | Developmental psych      | 0.033           | [-0.021, 0.087]  | 1.214  | 0.225     |
| Neurobiology essential | Developmental psych      | -0.072          | [-0.126, -0.019] | -2.637 | 0.008     |
| Holistic view          | Developmental psych      | 0.200           | [0.147, 0.254]   | 7.313  | <2.08e-04 |
| Personality stable     | Developmental psych      | 0.015           | [-0.039, 0.069]  | 0.533  | 0.594     |
| Context matters        | Developmental psych      | 0.089           | [0.036, 0.143]   | 3.255  | 0.001     |
| Capacities innate      | Developmental psych      | -0.133          | [-0.187, -0.079] | -4.851 | <2.08e-04 |
| Ideal rules            | Developmental psych      | -0.069          | [-0.123, -0.015] | -2.505 | 0.012     |
| Evolution matters      | Developmental psych      | -0.018          | [-0.072, 0.036]  | -0.656 | 0.512     |
| Computer analogy       | Developmental psych      | 0.032           | [-0.022, 0.085]  | 1.148  | 0.251     |
| Mind universal         | Developmental psych      | -0.097          | [-0.15, -0.043]  | -3.512 | <0.001    |
| Social environment     | Developmental psych      | 0.165           | [0.112, 0.219]   | 6.024  | <2.08e-04 |
| Perception veridical   | Developmental psych      | 0.010           | [-0.044, 0.064]  | 0.371  | 0.711     |
| Constructs real        | Educational psych        | -0.088          | [-0.156, -0.02]  | -2.539 | 0.011     |
| Thinking language      | Educational psych        | 0.182           | [0.114, 0.25]    | 5.266  | <2.08e-04 |

Supplementary Table 2: Regression coefficients, research areas (*continued*)

| Theme                  | Research area      | Coefficient (b) | CIs              | t      | p         |
|------------------------|--------------------|-----------------|------------------|--------|-----------|
| Math models            | Educational psych  | -0.049          | [-0.117, 0.019]  | -1.406 | 0.160     |
| Wide reach             | Educational psych  | 0.084           | [0.016, 0.152]   | 2.435  | 0.015     |
| Rational self-interest | Educational psych  | 0.100           | [0.032, 0.167]   | 2.876  | 0.004     |
| Neurobiology essential | Educational psych  | -0.080          | [-0.148, -0.012] | -2.315 | 0.021     |
| Holistic view          | Educational psych  | 0.058           | [-0.01, 0.126]   | 1.674  | 0.094     |
| Personality stable     | Educational psych  | -0.090          | [-0.158, -0.022] | -2.605 | 0.009     |
| Context matters        | Educational psych  | 0.075           | [0.007, 0.143]   | 2.175  | 0.030     |
| Capacities innate      | Educational psych  | -0.200          | [-0.268, -0.133] | -5.796 | <2.08e-04 |
| Ideal rules            | Educational psych  | -0.077          | [-0.145, -0.009] | -2.228 | 0.026     |
| Evolution matters      | Educational psych  | 0.013           | [-0.055, 0.081]  | 0.373  | 0.710     |
| Computer analogy       | Educational psych  | 0.061           | [-0.006, 0.129]  | 1.774  | 0.076     |
| Mind universal         | Educational psych  | -0.155          | [-0.223, -0.087] | -4.472 | <2.08e-04 |
| Social environment     | Educational psych  | 0.145           | [0.078, 0.213]   | 4.202  | <2.08e-04 |
| Perception veridical   | Educational psych  | 0.007           | [-0.061, 0.075]  | 0.203  | 0.839     |
| Constructs real        | Evolutionary psych | 0.272           | [0.18, 0.365]    | 5.771  | <2.08e-04 |
| Thinking language      | Evolutionary psych | -0.201          | [-0.294, -0.109] | -4.259 | <2.08e-04 |
| Math models            | Evolutionary psych | 0.051           | [-0.041, 0.144]  | 1.086  | 0.278     |
| Wide reach             | Evolutionary psych | 0.117           | [0.024, 0.209]   | 2.466  | 0.014     |
| Rational self-interest | Evolutionary psych | -0.085          | [-0.177, 0.008]  | -1.791 | 0.073     |
| Neurobiology essential | Evolutionary psych | 0.251           | [0.158, 0.343]   | 5.310  | <2.08e-04 |
| Holistic view          | Evolutionary psych | 0.042           | [-0.051, 0.135]  | 0.885  | 0.376     |
| Personality stable     | Evolutionary psych | 0.157           | [0.064, 0.25]    | 3.318  | 0.001     |
| Context matters        | Evolutionary psych | -0.119          | [-0.212, -0.027] | -2.522 | 0.012     |
| Capacities innate      | Evolutionary psych | 0.470           | [0.378, 0.562]   | 9.992  | <2.08e-04 |
| Ideal rules            | Evolutionary psych | 0.150           | [0.058, 0.243]   | 3.181  | 0.001     |
| Evolution matters      | Evolutionary psych | 1.293           | [1.205, 1.381]   | 28.703 | <2.08e-04 |
| Computer analogy       | Evolutionary psych | -0.010          | [-0.103, 0.082]  | -0.217 | 0.828     |
| Mind universal         | Evolutionary psych | 0.367           | [0.274, 0.459]   | 7.783  | <2.08e-04 |
| Social environment     | Evolutionary psych | -0.120          | [-0.213, -0.028] | -2.546 | 0.011     |
| Perception veridical   | Evolutionary psych | -0.031          | [-0.124, 0.061]  | -0.664 | 0.506     |
| Constructs real        | Forensic psych     | 0.046           | [-0.065, 0.157]  | 0.811  | 0.418     |
| Thinking language      | Forensic psych     | -0.021          | [-0.132, 0.091]  | -0.363 | 0.716     |
| Math models            | Forensic psych     | -0.117          | [-0.228, -0.006] | -2.062 | 0.039     |
| Wide reach             | Forensic psych     | -0.023          | [-0.135, 0.088]  | -0.414 | 0.679     |
| Rational self-interest | Forensic psych     | 0.111           | [0, 0.222]       | 1.954  | 0.051     |
| Neurobiology essential | Forensic psych     | -0.072          | [-0.183, 0.04]   | -1.262 | 0.207     |
| Holistic view          | Forensic psych     | -0.031          | [-0.142, 0.08]   | -0.547 | 0.584     |
| Personality stable     | Forensic psych     | 0.084           | [-0.027, 0.195]  | 1.477  | 0.140     |
| Context matters        | Forensic psych     | -0.083          | [-0.194, 0.028]  | -1.463 | 0.144     |
| Capacities innate      | Forensic psych     | 0.118           | [0.007, 0.229]   | 2.085  | 0.037     |
| Ideal rules            | Forensic psych     | -0.115          | [-0.226, -0.004] | -2.031 | 0.042     |
| Evolution matters      | Forensic psych     | 0.046           | [-0.065, 0.157]  | 0.811  | 0.417     |
| Computer analogy       | Forensic psych     | 0.044           | [-0.067, 0.156]  | 0.781  | 0.435     |
| Mind universal         | Forensic psych     | -0.046          | [-0.157, 0.065]  | -0.806 | 0.420     |

Supplementary Table 2: Regression coefficients, research areas (*continued*)

| Theme                  | Research area         | Coefficient (b) | CIs              | t      | p         |
|------------------------|-----------------------|-----------------|------------------|--------|-----------|
| Social environment     | Forensic psych        | -0.035          | [-0.146, 0.076]  | -0.622 | 0.534     |
| Perception veridical   | Forensic psych        | -0.158          | [-0.27, -0.047]  | -2.794 | 0.005     |
| Constructs real        | Neuropsych            | 0.121           | [0.049, 0.192]   | 3.319  | 0.001     |
| Thinking language      | Neuropsych            | -0.073          | [-0.144, -0.001] | -2.001 | 0.045     |
| Math models            | Neuropsych            | 0.088           | [0.017, 0.159]   | 2.420  | 0.016     |
| Wide reach             | Neuropsych            | -0.051          | [-0.122, 0.02]   | -1.405 | 0.160     |
| Rational self-interest | Neuropsych            | 0.144           | [0.072, 0.215]   | 3.955  | <2.08e-04 |
| Neurobiology essential | Neuropsych            | 0.551           | [0.48, 0.621]    | 15.369 | <2.08e-04 |
| Holistic view          | Neuropsych            | -0.107          | [-0.178, -0.036] | -2.940 | 0.003     |
| Personality stable     | Neuropsych            | 0.087           | [0.016, 0.159]   | 2.406  | 0.016     |
| Context matters        | Neuropsych            | -0.102          | [-0.173, -0.031] | -2.806 | 0.005     |
| Capacities innate      | Neuropsych            | 0.029           | [-0.042, 0.1]    | 0.799  | 0.424     |
| Ideal rules            | Neuropsych            | 0.081           | [0.01, 0.152]    | 2.233  | 0.026     |
| Evolution matters      | Neuropsych            | 0.258           | [0.187, 0.33]    | 7.134  | <2.08e-04 |
| Computer analogy       | Neuropsych            | 0.017           | [-0.054, 0.088]  | 0.467  | 0.641     |
| Mind universal         | Neuropsych            | 0.064           | [-0.007, 0.136]  | 1.770  | 0.077     |
| Social environment     | Neuropsych            | -0.229          | [-0.3, -0.158]   | -6.309 | <2.08e-04 |
| Perception veridical   | Neuropsych            | -0.066          | [-0.138, 0.005]  | -1.828 | 0.068     |
| Constructs real        | Occupational/IO psych | 0.105           | [0.028, 0.181]   | 2.675  | 0.007     |
| Thinking language      | Occupational/IO psych | 0.085           | [0.009, 0.162]   | 2.181  | 0.029     |
| Math models            | Occupational/IO psych | -0.123          | [-0.2, -0.047]   | -3.157 | 0.002     |
| Wide reach             | Occupational/IO psych | 0.053           | [-0.023, 0.13]   | 1.364  | 0.173     |
| Rational self-interest | Occupational/IO psych | -0.161          | [-0.238, -0.084] | -4.121 | <2.08e-04 |
| Neurobiology essential | Occupational/IO psych | -0.174          | [-0.25, -0.097]  | -4.445 | <2.08e-04 |
| Holistic view          | Occupational/IO psych | 0.084           | [0.008, 0.161]   | 2.161  | 0.031     |
| Personality stable     | Occupational/IO psych | 0.063           | [-0.014, 0.139]  | 1.607  | 0.108     |
| Context matters        | Occupational/IO psych | 0.071           | [-0.006, 0.147]  | 1.807  | 0.071     |
| Capacities innate      | Occupational/IO psych | -0.065          | [-0.142, 0.011]  | -1.666 | 0.096     |
| Ideal rules            | Occupational/IO psych | -0.013          | [-0.09, 0.063]   | -0.341 | 0.733     |
| Evolution matters      | Occupational/IO psych | -0.091          | [-0.168, -0.015] | -2.332 | 0.020     |
| Computer analogy       | Occupational/IO psych | -0.033          | [-0.11, 0.043]   | -0.849 | 0.396     |
| Mind universal         | Occupational/IO psych | -0.050          | [-0.127, 0.027]  | -1.278 | 0.201     |
| Social environment     | Occupational/IO psych | 0.242           | [0.165, 0.318]   | 6.197  | <2.08e-04 |
| Perception veridical   | Occupational/IO psych | -0.048          | [-0.125, 0.029]  | -1.231 | 0.218     |
| Constructs real        | Psychometrics         | 0.140           | [0.073, 0.208]   | 4.084  | <2.08e-04 |
| Thinking language      | Psychometrics         | 0.012           | [-0.055, 0.08]   | 0.357  | 0.721     |
| Math models            | Psychometrics         | 0.332           | [0.265, 0.399]   | 9.696  | <2.08e-04 |
| Wide reach             | Psychometrics         | 0.038           | [-0.03, 0.105]   | 1.091  | 0.275     |
| Rational self-interest | Psychometrics         | 0.046           | [-0.022, 0.113]  | 1.333  | 0.182     |
| Neurobiology essential | Psychometrics         | 0.043           | [-0.024, 0.11]   | 1.249  | 0.212     |
| Holistic view          | Psychometrics         | -0.053          | [-0.12, 0.015]   | -1.535 | 0.125     |
| Personality stable     | Psychometrics         | 0.127           | [0.059, 0.194]   | 3.687  | <0.001    |
| Context matters        | Psychometrics         | -0.121          | [-0.188, -0.054] | -3.518 | <0.001    |
| Capacities innate      | Psychometrics         | 0.063           | [-0.005, 0.13]   | 1.822  | 0.069     |

Supplementary Table 2: Regression coefficients, research areas (*continued*)

| Theme                  | Research area     | Coefficient (b) | CIs              | t      | p         |
|------------------------|-------------------|-----------------|------------------|--------|-----------|
| Ideal rules            | Psychometrics     | 0.087           | [0.02, 0.155]    | 2.540  | 0.011     |
| Evolution matters      | Psychometrics     | 0.135           | [0.068, 0.203]   | 3.941  | <2.08e-04 |
| Computer analogy       | Psychometrics     | 0.080           | [0.012, 0.147]   | 2.323  | 0.020     |
| Mind universal         | Psychometrics     | 0.033           | [-0.034, 0.101]  | 0.966  | 0.334     |
| Social environment     | Psychometrics     | -0.110          | [-0.177, -0.042] | -3.191 | 0.001     |
| Perception veridical   | Psychometrics     | 0.035           | [-0.033, 0.102]  | 1.009  | 0.313     |
| Constructs real        | Social psych      | -0.051          | [-0.101, -0.001] | -2.016 | 0.044     |
| Thinking language      | Social psych      | 0.058           | [0.008, 0.108]   | 2.279  | 0.023     |
| Math models            | Social psych      | -0.224          | [-0.274, -0.175] | -8.869 | <2.08e-04 |
| Wide reach             | Social psych      | 0.022           | [-0.027, 0.072]  | 0.884  | 0.377     |
| Rational self-interest | Social psych      | -0.168          | [-0.217, -0.118] | -6.607 | <2.08e-04 |
| Neurobiology essential | Social psych      | -0.242          | [-0.291, -0.192] | -9.560 | <2.08e-04 |
| Holistic view          | Social psych      | 0.160           | [0.111, 0.21]    | 6.328  | <2.08e-04 |
| Personality stable     | Social psych      | -0.063          | [-0.113, -0.013] | -2.490 | 0.013     |
| Context matters        | Social psych      | 0.086           | [0.036, 0.136]   | 3.392  | 0.001     |
| Capacities innate      | Social psych      | -0.023          | [-0.073, 0.027]  | -0.909 | 0.364     |
| Ideal rules            | Social psych      | -0.041          | [-0.091, 0.009]  | -1.610 | 0.107     |
| Evolution matters      | Social psych      | -0.115          | [-0.164, -0.065] | -4.514 | <2.08e-04 |
| Computer analogy       | Social psych      | 0.022           | [-0.028, 0.072]  | 0.877  | 0.380     |
| Mind universal         | Social psych      | -0.039          | [-0.089, 0.011]  | -1.524 | 0.128     |
| Social environment     | Social psych      | 0.369           | [0.32, 0.418]    | 14.706 | <2.08e-04 |
| Perception veridical   | Social psych      | 0.018           | [-0.032, 0.068]  | 0.702  | 0.483     |
| Constructs real        | Personality psych | 0.191           | [0.103, 0.279]   | 4.272  | <2.08e-04 |
| Thinking language      | Personality psych | -0.014          | [-0.102, 0.074]  | -0.317 | 0.751     |
| Math models            | Personality psych | 0.016           | [-0.072, 0.104]  | 0.359  | 0.720     |
| Wide reach             | Personality psych | 0.099           | [0.011, 0.187]   | 2.210  | 0.027     |
| Rational self-interest | Personality psych | 0.001           | [-0.087, 0.089]  | 0.024  | 0.981     |
| Neurobiology essential | Personality psych | -0.087          | [-0.175, 0.001]  | -1.939 | 0.053     |
| Holistic view          | Personality psych | 0.064           | [-0.024, 0.152]  | 1.434  | 0.152     |
| Personality stable     | Personality psych | 0.300           | [0.212, 0.387]   | 6.706  | <2.08e-04 |
| Context matters        | Personality psych | -0.148          | [-0.236, -0.06]  | -3.307 | 0.001     |
| Capacities innate      | Personality psych | 0.212           | [0.124, 0.3]     | 4.738  | <2.08e-04 |
| Ideal rules            | Personality psych | -0.026          | [-0.114, 0.062]  | -0.583 | 0.560     |
| Evolution matters      | Personality psych | 0.136           | [0.048, 0.223]   | 3.028  | 0.002     |
| Computer analogy       | Personality psych | 0.083           | [-0.005, 0.171]  | 1.849  | 0.064     |
| Mind universal         | Personality psych | -0.027          | [-0.115, 0.06]   | -0.612 | 0.541     |
| Social environment     | Personality psych | 0.002           | [-0.085, 0.09]   | 0.055  | 0.956     |
| Perception veridical   | Personality psych | -0.021          | [-0.109, 0.067]  | -0.474 | 0.635     |

Supplementary Table 3: Regression coefficients for controversial themes as a function of research methods (each a separate regression model). Results correspond to Fig. 3b in the main text. Regression coefficients (b) represent logits, with the outcome (theme) standardized. P-values in gray reflect cases that failed to meet the Bonferroni-adjusted significance threshold discussed in the main text ( $p < .000142$ ).

| Theme                  | Research method            | Coefficient (b) | CIs              | t       | p         |
|------------------------|----------------------------|-----------------|------------------|---------|-----------|
| Constructs real        | Behav expt: typical adults | 0.206           | [0.162, 0.25]    | 9.248   | <1.42e-04 |
| Thinking language      | Behav expt: typical adults | -0.115          | [-0.159, -0.071] | -5.144  | <1.42e-04 |
| Math models            | Behav expt: typical adults | 0.291           | [0.248, 0.335]   | 13.137  | <1.42e-04 |
| Wide reach             | Behav expt: typical adults | 0.103           | [0.059, 0.147]   | 4.612   | <1.42e-04 |
| Rational self-interest | Behav expt: typical adults | -0.151          | [-0.195, -0.107] | -6.771  | <1.42e-04 |
| Neurobiology essential | Behav expt: typical adults | 0.173           | [0.13, 0.217]    | 7.768   | <1.42e-04 |
| Holistic view          | Behav expt: typical adults | -0.255          | [-0.298, -0.211] | -11.463 | <1.42e-04 |
| Personality stable     | Behav expt: typical adults | 0.019           | [-0.025, 0.063]  | 0.866   | 0.387     |
| Context matters        | Behav expt: typical adults | -0.108          | [-0.151, -0.064] | -4.812  | <1.42e-04 |
| Capacities innate      | Behav expt: typical adults | 0.129           | [0.085, 0.173]   | 5.772   | <1.42e-04 |
| Ideal rules            | Behav expt: typical adults | 0.265           | [0.221, 0.308]   | 11.926  | <1.42e-04 |
| Evolution matters      | Behav expt: typical adults | -0.022          | [-0.066, 0.022]  | -0.969  | 0.332     |
| Computer analogy       | Behav expt: typical adults | 0.102           | [0.059, 0.146]   | 4.580   | <1.42e-04 |
| Mind universal         | Behav expt: typical adults | 0.330           | [0.287, 0.374]   | 14.948  | <1.42e-04 |
| Social environment     | Behav expt: typical adults | -0.413          | [-0.456, -0.37]  | -18.863 | <1.42e-04 |
| Perception veridical   | Behav expt: typical adults | 0.013           | [-0.031, 0.057]  | 0.569   | 0.569     |
| Constructs real        | Behav expt: children       | 0.053           | [-0.004, 0.111]  | 1.817   | 0.069     |
| Thinking language      | Behav expt: children       | 0.028           | [-0.029, 0.086]  | 0.962   | 0.336     |
| Math models            | Behav expt: children       | 0.053           | [-0.004, 0.11]   | 1.812   | 0.070     |
| Wide reach             | Behav expt: children       | 0.049           | [-0.008, 0.107]  | 1.685   | 0.092     |
| Rational self-interest | Behav expt: children       | 0.128           | [0.07, 0.185]    | 4.365   | <1.42e-04 |
| Neurobiology essential | Behav expt: children       | 0.079           | [0.022, 0.136]   | 2.696   | 0.007     |
| Holistic view          | Behav expt: children       | -0.007          | [-0.065, 0.05]   | -0.244  | 0.807     |
| Personality stable     | Behav expt: children       | 0.010           | [-0.048, 0.067]  | 0.338   | 0.735     |
| Context matters        | Behav expt: children       | 0.040           | [-0.018, 0.097]  | 1.353   | 0.176     |
| Capacities innate      | Behav expt: children       | -0.100          | [-0.158, -0.043] | -3.423  | 0.001     |
| Ideal rules            | Behav expt: children       | 0.070           | [0.013, 0.127]   | 2.392   | 0.017     |
| Evolution matters      | Behav expt: children       | -0.008          | [-0.065, 0.05]   | -0.261  | 0.794     |
| Computer analogy       | Behav expt: children       | 0.030           | [-0.028, 0.087]  | 1.020   | 0.308     |
| Mind universal         | Behav expt: children       | 0.102           | [0.045, 0.16]    | 3.499   | <0.001    |
| Social environment     | Behav expt: children       | -0.123          | [-0.18, -0.065]  | -4.188  | <1.42e-04 |
| Perception veridical   | Behav expt: children       | 0.060           | [0.002, 0.117]   | 2.036   | 0.042     |
| Constructs real        | Behav expt: atypical pop   | 0.094           | [0.039, 0.149]   | 3.324   | 0.001     |
| Thinking language      | Behav expt: atypical pop   | -0.073          | [-0.128, -0.017] | -2.573  | 0.010     |
| Math models            | Behav expt: atypical pop   | 0.196           | [0.14, 0.251]    | 6.934   | <1.42e-04 |
| Wide reach             | Behav expt: atypical pop   | 0.071           | [0.015, 0.126]   | 2.508   | 0.012     |
| Rational self-interest | Behav expt: atypical pop   | 0.051           | [-0.004, 0.107]  | 1.818   | 0.069     |
| Neurobiology essential | Behav expt: atypical pop   | 0.300           | [0.244, 0.355]   | 10.666  | <1.42e-04 |
| Holistic view          | Behav expt: atypical pop   | -0.150          | [-0.206, -0.095] | -5.320  | <1.42e-04 |
| Personality stable     | Behav expt: atypical pop   | 0.018           | [-0.037, 0.074]  | 0.650   | 0.515     |

Supplementary Table 3: Regression coefficients, research methods (*continued*)

| Theme                  | Research method           | Coefficient (b) | CIs              | t       | p         |
|------------------------|---------------------------|-----------------|------------------|---------|-----------|
| Context matters        | Behav expt: atypical pop  | -0.057          | [-0.113, -0.002] | -2.022  | 0.043     |
| Capacities innate      | Behav expt: atypical pop  | 0.033           | [-0.022, 0.089]  | 1.174   | 0.240     |
| Ideal rules            | Behav expt: atypical pop  | 0.062           | [0.007, 0.118]   | 2.201   | 0.028     |
| Evolution matters      | Behav expt: atypical pop  | 0.069           | [0.013, 0.124]   | 2.434   | 0.015     |
| Computer analogy       | Behav expt: atypical pop  | 0.044           | [-0.012, 0.099]  | 1.551   | 0.121     |
| Mind universal         | Behav expt: atypical pop  | 0.086           | [0.031, 0.142]   | 3.060   | 0.002     |
| Social environment     | Behav expt: atypical pop  | -0.300          | [-0.356, -0.245] | -10.701 | <1.42e-04 |
| Perception veridical   | Behav expt: atypical pop  | -0.033          | [-0.089, 0.022]  | -1.170  | 0.242     |
| Constructs real        | Behav expt: animals       | 0.199           | [0.104, 0.294]   | 4.127   | <1.42e-04 |
| Thinking language      | Behav expt: animals       | -0.273          | [-0.367, -0.178] | -5.663  | <1.42e-04 |
| Math models            | Behav expt: animals       | 0.185           | [0.09, 0.279]    | 3.832   | <1.42e-04 |
| Wide reach             | Behav expt: animals       | 0.185           | [0.09, 0.279]    | 3.826   | <1.42e-04 |
| Rational self-interest | Behav expt: animals       | 0.048           | [-0.047, 0.142]  | 0.990   | 0.322     |
| Neurobiology essential | Behav expt: animals       | 0.651           | [0.558, 0.745]   | 13.646  | <1.42e-04 |
| Holistic view          | Behav expt: animals       | -0.251          | [-0.345, -0.156] | -5.199  | <1.42e-04 |
| Personality stable     | Behav expt: animals       | 0.044           | [-0.051, 0.138]  | 0.907   | 0.364     |
| Context matters        | Behav expt: animals       | -0.054          | [-0.148, 0.041]  | -1.116  | 0.265     |
| Capacities innate      | Behav expt: animals       | 0.097           | [0.002, 0.192]   | 2.008   | 0.045     |
| Ideal rules            | Behav expt: animals       | 0.224           | [0.129, 0.318]   | 4.640   | <1.42e-04 |
| Evolution matters      | Behav expt: animals       | 0.474           | [0.38, 0.568]    | 9.881   | <1.42e-04 |
| Computer analogy       | Behav expt: animals       | -0.172          | [-0.266, -0.077] | -3.559  | <0.001    |
| Mind universal         | Behav expt: animals       | 0.160           | [0.066, 0.255]   | 3.320   | 0.001     |
| Social environment     | Behav expt: animals       | -0.375          | [-0.47, -0.281]  | -7.805  | <1.42e-04 |
| Perception veridical   | Behav expt: animals       | -0.124          | [-0.218, -0.029] | -2.564  | 0.010     |
| Constructs real        | Electrophys (EEG/ERP)     | 0.164           | [0.099, 0.228]   | 4.967   | <1.42e-04 |
| Thinking language      | Electrophys (EEG/ERP)     | -0.143          | [-0.207, -0.078] | -4.337  | <1.42e-04 |
| Math models            | Electrophys (EEG/ERP)     | 0.353           | [0.288, 0.417]   | 10.765  | <1.42e-04 |
| Wide reach             | Electrophys (EEG/ERP)     | 0.039           | [-0.026, 0.104]  | 1.185   | 0.236     |
| Rational self-interest | Electrophys (EEG/ERP)     | 0.005           | [-0.06, 0.069]   | 0.139   | 0.889     |
| Neurobiology essential | Electrophys (EEG/ERP)     | 0.580           | [0.517, 0.643]   | 17.933  | <1.42e-04 |
| Holistic view          | Electrophys (EEG/ERP)     | -0.119          | [-0.184, -0.055] | -3.614  | <0.001    |
| Personality stable     | Electrophys (EEG/ERP)     | 0.026           | [-0.038, 0.091]  | 0.796   | 0.426     |
| Context matters        | Electrophys (EEG/ERP)     | -0.079          | [-0.144, -0.014] | -2.399  | 0.016     |
| Capacities innate      | Electrophys (EEG/ERP)     | 0.030           | [-0.035, 0.094]  | 0.903   | 0.367     |
| Ideal rules            | Electrophys (EEG/ERP)     | 0.150           | [0.085, 0.214]   | 4.538   | <1.42e-04 |
| Evolution matters      | Electrophys (EEG/ERP)     | 0.168           | [0.103, 0.232]   | 5.087   | <1.42e-04 |
| Computer analogy       | Electrophys (EEG/ERP)     | -0.027          | [-0.092, 0.038]  | -0.817  | 0.414     |
| Mind universal         | Electrophys (EEG/ERP)     | 0.230           | [0.166, 0.295]   | 7.003   | <1.42e-04 |
| Social environment     | Electrophys (EEG/ERP)     | -0.527          | [-0.59, -0.463]  | -16.227 | <1.42e-04 |
| Perception veridical   | Electrophys (EEG/ERP)     | -0.085          | [-0.15, -0.021]  | -2.586  | 0.010     |
| Constructs real        | Electrophys (single cell) | 0.238           | [0.054, 0.423]   | 2.540   | 0.011     |
| Thinking language      | Electrophys (single cell) | -0.316          | [-0.5, -0.132]   | -3.367  | 0.001     |
| Math models            | Electrophys (single cell) | 0.461           | [0.277, 0.644]   | 4.910   | <1.42e-04 |
| Wide reach             | Electrophys (single cell) | 0.192           | [0.008, 0.377]   | 2.049   | 0.040     |

Supplementary Table 3: Regression coefficients, research methods (*continued*)

| Theme                  | Research method           | Coefficient (b) | CIs              | t       | p         |
|------------------------|---------------------------|-----------------|------------------|---------|-----------|
| Rational self-interest | Electrophys (single cell) | -0.040          | [-0.224, 0.144]  | -0.428  | 0.669     |
| Neurobiology essential | Electrophys (single cell) | 1.163           | [0.98, 1.345]    | 12.497  | <1.42e-04 |
| Holistic view          | Electrophys (single cell) | -0.237          | [-0.421, -0.053] | -2.521  | 0.012     |
| Personality stable     | Electrophys (single cell) | -0.235          | [-0.419, -0.051] | -2.504  | 0.012     |
| Context matters        | Electrophys (single cell) | 0.024           | [-0.16, 0.208]   | 0.257   | 0.797     |
| Capacities innate      | Electrophys (single cell) | 0.044           | [-0.14, 0.228]   | 0.470   | 0.638     |
| Ideal rules            | Electrophys (single cell) | 0.092           | [-0.092, 0.276]  | 0.980   | 0.327     |
| Evolution matters      | Electrophys (single cell) | 0.312           | [0.128, 0.496]   | 3.325   | 0.001     |
| Computer analogy       | Electrophys (single cell) | -0.299          | [-0.483, -0.115] | -3.184  | 0.001     |
| Mind universal         | Electrophys (single cell) | 0.085           | [-0.1, 0.269]    | 0.900   | 0.368     |
| Social environment     | Electrophys (single cell) | -0.492          | [-0.676, -0.308] | -5.250  | <1.42e-04 |
| Perception veridical   | Electrophys (single cell) | -0.149          | [-0.333, 0.036]  | -1.582  | 0.114     |
| Constructs real        | Neuroimaging              | 0.047           | [-0.018, 0.112]  | 1.427   | 0.154     |
| Thinking language      | Neuroimaging              | -0.123          | [-0.187, -0.058] | -3.716  | <0.001    |
| Math models            | Neuroimaging              | 0.308           | [0.243, 0.372]   | 9.370   | <1.42e-04 |
| Wide reach             | Neuroimaging              | 0.029           | [-0.035, 0.094]  | 0.892   | 0.373     |
| Rational self-interest | Neuroimaging              | -0.015          | [-0.08, 0.049]   | -0.468  | 0.639     |
| Neurobiology essential | Neuroimaging              | 0.622           | [0.559, 0.686]   | 19.288  | <1.42e-04 |
| Holistic view          | Neuroimaging              | -0.101          | [-0.166, -0.036] | -3.066  | 0.002     |
| Personality stable     | Neuroimaging              | 0.036           | [-0.028, 0.101]  | 1.104   | 0.270     |
| Context matters        | Neuroimaging              | -0.105          | [-0.17, -0.04]   | -3.179  | 0.001     |
| Capacities innate      | Neuroimaging              | 0.065           | [0, 0.13]        | 1.972   | 0.049     |
| Ideal rules            | Neuroimaging              | 0.126           | [0.061, 0.191]   | 3.825   | <1.42e-04 |
| Evolution matters      | Neuroimaging              | 0.107           | [0.042, 0.171]   | 3.236   | 0.001     |
| Computer analogy       | Neuroimaging              | -0.051          | [-0.116, 0.013]  | -1.559  | 0.119     |
| Mind universal         | Neuroimaging              | 0.183           | [0.119, 0.248]   | 5.559   | <1.42e-04 |
| Social environment     | Neuroimaging              | -0.515          | [-0.579, -0.452] | -15.856 | <1.42e-04 |
| Perception veridical   | Neuroimaging              | -0.016          | [-0.081, 0.049]  | -0.488  | 0.626     |
| Constructs real        | Observational Studies     | -0.102          | [-0.148, -0.056] | -4.316  | <1.42e-04 |
| Thinking language      | Observational Studies     | 0.072           | [0.026, 0.119]   | 3.054   | 0.002     |
| Math models            | Observational Studies     | -0.168          | [-0.214, -0.122] | -7.121  | <1.42e-04 |
| Wide reach             | Observational Studies     | -0.006          | [-0.053, 0.04]   | -0.263  | 0.792     |
| Rational self-interest | Observational Studies     | 0.023           | [-0.023, 0.07]   | 0.980   | 0.327     |
| Neurobiology essential | Observational Studies     | -0.176          | [-0.222, -0.13]  | -7.460  | <1.42e-04 |
| Holistic view          | Observational Studies     | 0.205           | [0.159, 0.251]   | 8.709   | <1.42e-04 |
| Personality stable     | Observational Studies     | -0.042          | [-0.089, 0.004]  | -1.793  | 0.073     |
| Context matters        | Observational Studies     | 0.131           | [0.085, 0.177]   | 5.549   | <1.42e-04 |
| Capacities innate      | Observational Studies     | -0.074          | [-0.12, -0.028]  | -3.127  | 0.002     |
| Ideal rules            | Observational Studies     | -0.149          | [-0.195, -0.102] | -6.299  | <1.42e-04 |
| Evolution matters      | Observational Studies     | 0.049           | [0.003, 0.096]   | 2.092   | 0.036     |
| Computer analogy       | Observational Studies     | -0.027          | [-0.073, 0.02]   | -1.131  | 0.258     |
| Mind universal         | Observational Studies     | -0.107          | [-0.153, -0.06]  | -4.510  | <1.42e-04 |
| Social environment     | Observational Studies     | 0.299           | [0.253, 0.345]   | 12.768  | <1.42e-04 |
| Perception veridical   | Observational Studies     | -0.003          | [-0.05, 0.043]   | -0.139  | 0.889     |

Supplementary Table 3: Regression coefficients, research methods (*continued*)

| Theme                  | Research method           | Coefficient (b) | CIs              | t       | p         |
|------------------------|---------------------------|-----------------|------------------|---------|-----------|
| Constructs real        | Comp ling/corpus analysis | -0.083          | [-0.173, 0.007]  | -1.817  | 0.069     |
| Thinking language      | Comp ling/corpus analysis | 0.185           | [0.096, 0.275]   | 4.050   | <1.42e-04 |
| Math models            | Comp ling/corpus analysis | 0.287           | [0.197, 0.376]   | 6.274   | <1.42e-04 |
| Wide reach             | Comp ling/corpus analysis | -0.015          | [-0.105, 0.075]  | -0.325  | 0.745     |
| Rational self-interest | Comp ling/corpus analysis | -0.133          | [-0.223, -0.043] | -2.902  | 0.004     |
| Neurobiology essential | Comp ling/corpus analysis | -0.067          | [-0.157, 0.023]  | -1.466  | 0.143     |
| Holistic view          | Comp ling/corpus analysis | -0.044          | [-0.133, 0.046]  | -0.953  | 0.341     |
| Personality stable     | Comp ling/corpus analysis | -0.202          | [-0.291, -0.112] | -4.409  | <1.42e-04 |
| Context matters        | Comp ling/corpus analysis | 0.078           | [-0.012, 0.168]  | 1.703   | 0.089     |
| Capacities innate      | Comp ling/corpus analysis | -0.041          | [-0.13, 0.049]   | -0.887  | 0.375     |
| Ideal rules            | Comp ling/corpus analysis | 0.190           | [0.1, 0.28]      | 4.153   | <1.42e-04 |
| Evolution matters      | Comp ling/corpus analysis | -0.051          | [-0.14, 0.039]   | -1.107  | 0.269     |
| Computer analogy       | Comp ling/corpus analysis | 0.082           | [-0.007, 0.172]  | 1.798   | 0.072     |
| Mind universal         | Comp ling/corpus analysis | 0.177           | [0.088, 0.267]   | 3.877   | <1.42e-04 |
| Social environment     | Comp ling/corpus analysis | -0.235          | [-0.325, -0.146] | -5.146  | <1.42e-04 |
| Perception veridical   | Comp ling/corpus analysis | -0.033          | [-0.123, 0.057]  | -0.715  | 0.474     |
| Constructs real        | Comp/math modeling        | 0.063           | [0.005, 0.121]   | 2.144   | 0.032     |
| Thinking language      | Comp/math modeling        | -0.101          | [-0.158, -0.043] | -3.431  | 0.001     |
| Math models            | Comp/math modeling        | 0.723           | [0.668, 0.778]   | 25.595  | <1.42e-04 |
| Wide reach             | Comp/math modeling        | 0.088           | [0.03, 0.145]    | 2.991   | 0.003     |
| Rational self-interest | Comp/math modeling        | -0.103          | [-0.161, -0.045] | -3.507  | <0.001    |
| Neurobiology essential | Comp/math modeling        | 0.132           | [0.074, 0.189]   | 4.492   | <1.42e-04 |
| Holistic view          | Comp/math modeling        | -0.135          | [-0.192, -0.077] | -4.591  | <1.42e-04 |
| Personality stable     | Comp/math modeling        | -0.083          | [-0.14, -0.025]  | -2.810  | 0.005     |
| Context matters        | Comp/math modeling        | -0.025          | [-0.082, 0.033]  | -0.840  | 0.401     |
| Capacities innate      | Comp/math modeling        | 0.063           | [0.005, 0.121]   | 2.144   | 0.032     |
| Ideal rules            | Comp/math modeling        | 0.203           | [0.145, 0.26]    | 6.918   | <1.42e-04 |
| Evolution matters      | Comp/math modeling        | -0.015          | [-0.073, 0.043]  | -0.510  | 0.610     |
| Computer analogy       | Comp/math modeling        | -0.003          | [-0.061, 0.055]  | -0.102  | 0.919     |
| Mind universal         | Comp/math modeling        | 0.219           | [0.162, 0.277]   | 7.493   | <1.42e-04 |
| Social environment     | Comp/math modeling        | -0.398          | [-0.455, -0.341] | -13.686 | <1.42e-04 |
| Perception veridical   | Comp/math modeling        | 0.049           | [-0.008, 0.107]  | 1.674   | 0.094     |
| Constructs real        | Clin intervention         | -0.077          | [-0.132, -0.021] | -2.715  | 0.007     |
| Thinking language      | Clin intervention         | 0.022           | [-0.033, 0.078]  | 0.789   | 0.430     |
| Math models            | Clin intervention         | -0.103          | [-0.158, -0.047] | -3.626  | <0.001    |
| Wide reach             | Clin intervention         | -0.144          | [-0.2, -0.089]   | -5.102  | <1.42e-04 |
| Rational self-interest | Clin intervention         | 0.173           | [0.118, 0.229]   | 6.132   | <1.42e-04 |
| Neurobiology essential | Clin intervention         | -0.081          | [-0.136, -0.025] | -2.844  | 0.004     |
| Holistic view          | Clin intervention         | 0.158           | [0.102, 0.213]   | 5.579   | <1.42e-04 |
| Personality stable     | Clin intervention         | -0.001          | [-0.057, 0.054]  | -0.045  | 0.964     |
| Context matters        | Clin intervention         | 0.037           | [-0.019, 0.093]  | 1.305   | 0.192     |
| Capacities innate      | Clin intervention         | -0.052          | [-0.108, 0.003]  | -1.851  | 0.064     |
| Ideal rules            | Clin intervention         | -0.149          | [-0.204, -0.093] | -5.255  | <1.42e-04 |
| Evolution matters      | Clin intervention         | 0.070           | [0.014, 0.125]   | 2.459   | 0.014     |



Supplementary Table 3: Regression coefficients, research methods (*continued*)

| Theme                  | Research method   | Coefficient (b) | CIs              | t       | p         |
|------------------------|-------------------|-----------------|------------------|---------|-----------|
| Computer analogy       | Clin intervention | -0.011          | [-0.067, 0.044]  | -0.392  | 0.695     |
| Mind universal         | Clin intervention | -0.184          | [-0.24, -0.129]  | -6.527  | <1.42e-04 |
| Social environment     | Clin intervention | 0.232           | [0.176, 0.287]   | 8.205   | <1.42e-04 |
| Perception veridical   | Clin intervention | -0.103          | [-0.159, -0.048] | -3.645  | <0.001    |
| Constructs real        | Case study        | -0.305          | [-0.359, -0.25]  | -10.960 | <1.42e-04 |
| Thinking language      | Case study        | 0.111           | [0.056, 0.165]   | 3.950   | <1.42e-04 |
| Math models            | Case study        | -0.360          | [-0.415, -0.306] | -12.993 | <1.42e-04 |
| Wide reach             | Case study        | -0.127          | [-0.182, -0.073] | -4.554  | <1.42e-04 |
| Rational self-interest | Case study        | 0.031           | [-0.024, 0.086]  | 1.100   | 0.271     |
| Neurobiology essential | Case study        | -0.213          | [-0.267, -0.158] | -7.618  | <1.42e-04 |
| Holistic view          | Case study        | 0.230           | [0.176, 0.285]   | 8.259   | <1.42e-04 |
| Personality stable     | Case study        | -0.235          | [-0.289, -0.18]  | -8.414  | <1.42e-04 |
| Context matters        | Case study        | 0.182           | [0.127, 0.237]   | 6.519   | <1.42e-04 |
| Capacities innate      | Case study        | -0.188          | [-0.243, -0.133] | -6.719  | <1.42e-04 |
| Ideal rules            | Case study        | -0.272          | [-0.327, -0.218] | -9.773  | <1.42e-04 |
| Evolution matters      | Case study        | 0.063           | [0.008, 0.118]   | 2.244   | 0.025     |
| Computer analogy       | Case study        | -0.153          | [-0.208, -0.098] | -5.473  | <1.42e-04 |
| Mind universal         | Case study        | -0.299          | [-0.354, -0.245] | -10.753 | <1.42e-04 |
| Social environment     | Case study        | 0.348           | [0.294, 0.402]   | 12.539  | <1.42e-04 |
| Perception veridical   | Case study        | -0.032          | [-0.087, 0.023]  | -1.147  | 0.252     |
| Constructs real        | Surveys           | 0.006           | [-0.038, 0.051]  | 0.285   | 0.776     |
| Thinking language      | Surveys           | 0.016           | [-0.028, 0.06]   | 0.710   | 0.478     |
| Math models            | Surveys           | -0.168          | [-0.213, -0.124] | -7.455  | <1.42e-04 |
| Wide reach             | Surveys           | -0.007          | [-0.051, 0.037]  | -0.306  | 0.760     |
| Rational self-interest | Surveys           | 0.055           | [0.01, 0.099]    | 2.416   | 0.016     |
| Neurobiology essential | Surveys           | -0.257          | [-0.301, -0.212] | -11.413 | <1.42e-04 |
| Holistic view          | Surveys           | 0.151           | [0.106, 0.195]   | 6.665   | <1.42e-04 |
| Personality stable     | Surveys           | 0.048           | [0.004, 0.092]   | 2.122   | 0.034     |
| Context matters        | Surveys           | 0.015           | [-0.03, 0.059]   | 0.641   | 0.522     |
| Capacities innate      | Surveys           | 0.032           | [-0.013, 0.076]  | 1.402   | 0.161     |
| Ideal rules            | Surveys           | -0.057          | [-0.101, -0.013] | -2.519  | 0.012     |
| Evolution matters      | Surveys           | -0.180          | [-0.225, -0.136] | -7.994  | <1.42e-04 |
| Computer analogy       | Surveys           | 0.108           | [0.064, 0.153]   | 4.790   | <1.42e-04 |
| Mind universal         | Surveys           | -0.120          | [-0.164, -0.075] | -5.285  | <1.42e-04 |
| Social environment     | Surveys           | 0.389           | [0.345, 0.433]   | 17.495  | <1.42e-04 |
| Perception veridical   | Surveys           | -0.002          | [-0.046, 0.043]  | -0.075  | 0.941     |
| Constructs real        | Meta-analyses     | 0.014           | [-0.043, 0.071]  | 0.490   | 0.624     |
| Thinking language      | Meta-analyses     | 0.028           | [-0.028, 0.085]  | 0.976   | 0.329     |
| Math models            | Meta-analyses     | 0.074           | [0.017, 0.131]   | 2.555   | 0.011     |
| Wide reach             | Meta-analyses     | 0.030           | [-0.026, 0.087]  | 1.053   | 0.292     |
| Rational self-interest | Meta-analyses     | -0.011          | [-0.068, 0.046]  | -0.387  | 0.699     |
| Neurobiology essential | Meta-analyses     | -0.071          | [-0.128, -0.014] | -2.459  | 0.014     |
| Holistic view          | Meta-analyses     | 0.066           | [0.01, 0.123]    | 2.293   | 0.022     |
| Personality stable     | Meta-analyses     | 0.064           | [0.007, 0.12]    | 2.195   | 0.028     |

Supplementary Table 3: Regression coefficients, research methods (*continued*)

| Theme                  | Research method               | Coefficient (b) | CIs              | t       | p         |
|------------------------|-------------------------------|-----------------|------------------|---------|-----------|
| Context matters        | Meta-analyses                 | -0.010          | [-0.067, 0.047]  | -0.341  | 0.733     |
| Capacities innate      | Meta-analyses                 | -0.017          | [-0.074, 0.039]  | -0.595  | 0.552     |
| Ideal rules            | Meta-analyses                 | -0.016          | [-0.073, 0.04]   | -0.564  | 0.572     |
| Evolution matters      | Meta-analyses                 | 0.002           | [-0.055, 0.059]  | 0.072   | 0.943     |
| Computer analogy       | Meta-analyses                 | 0.026           | [-0.03, 0.083]   | 0.910   | 0.363     |
| Mind universal         | Meta-analyses                 | -0.025          | [-0.081, 0.032]  | -0.849  | 0.396     |
| Social environment     | Meta-analyses                 | 0.048           | [-0.009, 0.105]  | 1.659   | 0.097     |
| Perception veridical   | Meta-analyses                 | 0.026           | [-0.031, 0.083]  | 0.898   | 0.369     |
| Constructs real        | Pharm intervention            | 0.053           | [-0.05, 0.156]   | 1.008   | 0.314     |
| Thinking language      | Pharm intervention            | -0.210          | [-0.313, -0.107] | -4.007  | <1.42e-04 |
| Math models            | Pharm intervention            | 0.079           | [-0.024, 0.182]  | 1.503   | 0.133     |
| Wide reach             | Pharm intervention            | -0.025          | [-0.128, 0.078]  | -0.477  | 0.633     |
| Rational self-interest | Pharm intervention            | 0.163           | [0.06, 0.265]    | 3.106   | 0.002     |
| Neurobiology essential | Pharm intervention            | 0.569           | [0.467, 0.671]   | 10.927  | <1.42e-04 |
| Holistic view          | Pharm intervention            | -0.142          | [-0.245, -0.039] | -2.706  | 0.007     |
| Personality stable     | Pharm intervention            | 0.093           | [-0.01, 0.196]   | 1.772   | 0.076     |
| Context matters        | Pharm intervention            | -0.156          | [-0.259, -0.053] | -2.973  | 0.003     |
| Capacities innate      | Pharm intervention            | 0.077           | [-0.026, 0.18]   | 1.473   | 0.141     |
| Ideal rules            | Pharm intervention            | 0.076           | [-0.027, 0.179]  | 1.446   | 0.148     |
| Evolution matters      | Pharm intervention            | 0.163           | [0.06, 0.266]    | 3.114   | 0.002     |
| Computer analogy       | Pharm intervention            | -0.109          | [-0.212, -0.006] | -2.078  | 0.038     |
| Mind universal         | Pharm intervention            | -0.033          | [-0.136, 0.07]   | -0.631  | 0.528     |
| Social environment     | Pharm intervention            | -0.270          | [-0.373, -0.168] | -5.165  | <1.42e-04 |
| Perception veridical   | Pharm intervention            | -0.138          | [-0.24, -0.035]  | -2.628  | 0.009     |
| Constructs real        | Eye-tracking                  | 0.078           | [0.014, 0.142]   | 2.399   | 0.016     |
| Thinking language      | Eye-tracking                  | -0.096          | [-0.16, -0.033]  | -2.967  | 0.003     |
| Math models            | Eye-tracking                  | 0.340           | [0.277, 0.403]   | 10.519  | <1.42e-04 |
| Wide reach             | Eye-tracking                  | 0.065           | [0.002, 0.129]   | 2.008   | 0.045     |
| Rational self-interest | Eye-tracking                  | -0.075          | [-0.139, -0.011] | -2.303  | 0.021     |
| Neurobiology essential | Eye-tracking                  | 0.295           | [0.232, 0.359]   | 9.123   | <1.42e-04 |
| Holistic view          | Eye-tracking                  | -0.211          | [-0.275, -0.148] | -6.514  | <1.42e-04 |
| Personality stable     | Eye-tracking                  | -0.053          | [-0.117, 0.011]  | -1.624  | 0.104     |
| Context matters        | Eye-tracking                  | -0.062          | [-0.126, 0.001]  | -1.916  | 0.055     |
| Capacities innate      | Eye-tracking                  | 0.034           | [-0.03, 0.097]   | 1.034   | 0.301     |
| Ideal rules            | Eye-tracking                  | 0.184           | [0.121, 0.248]   | 5.681   | <1.42e-04 |
| Evolution matters      | Eye-tracking                  | 0.001           | [-0.063, 0.065]  | 0.037   | 0.971     |
| Computer analogy       | Eye-tracking                  | 0.044           | [-0.02, 0.108]   | 1.360   | 0.174     |
| Mind universal         | Eye-tracking                  | 0.309           | [0.246, 0.373]   | 9.566   | <1.42e-04 |
| Social environment     | Eye-tracking                  | -0.508          | [-0.571, -0.445] | -15.857 | <1.42e-04 |
| Perception veridical   | Eye-tracking                  | 0.000           | [-0.064, 0.064]  | -0.008  | 0.993     |
| Constructs real        | Cranial stim (e.g. TMS; tDCS) | 0.085           | [-0.034, 0.203]  | 1.402   | 0.161     |
| Thinking language      | Cranial stim (e.g. TMS; tDCS) | -0.220          | [-0.339, -0.102] | -3.651  | <0.001    |
| Math models            | Cranial stim (e.g. TMS; tDCS) | 0.301           | [0.183, 0.419]   | 4.985   | <1.42e-04 |
| Wide reach             | Cranial stim (e.g. TMS; tDCS) | -0.006          | [-0.125, 0.112]  | -0.100  | 0.920     |

Supplementary Table 3: Regression coefficients, research methods (*continued*)

| Theme                  | Research method               | Coefficient (b) | CIs              | t       | p         |
|------------------------|-------------------------------|-----------------|------------------|---------|-----------|
| Rational self-interest | Cranial stim (e.g. TMS; tDCS) | -0.080          | [-0.199, 0.038]  | -1.329  | 0.184     |
| Neurobiology essential | Cranial stim (e.g. TMS; tDCS) | 0.748           | [0.63, 0.865]    | 12.496  | <1.42e-04 |
| Holistic view          | Cranial stim (e.g. TMS; tDCS) | -0.201          | [-0.319, -0.083] | -3.328  | 0.001     |
| Personality stable     | Cranial stim (e.g. TMS; tDCS) | 0.074           | [-0.045, 0.192]  | 1.219   | 0.223     |
| Context matters        | Cranial stim (e.g. TMS; tDCS) | -0.113          | [-0.232, 0.005]  | -1.877  | 0.061     |
| Capacities innate      | Cranial stim (e.g. TMS; tDCS) | 0.099           | [-0.019, 0.218]  | 1.645   | 0.100     |
| Ideal rules            | Cranial stim (e.g. TMS; tDCS) | 0.141           | [0.022, 0.259]   | 2.329   | 0.020     |
| Evolution matters      | Cranial stim (e.g. TMS; tDCS) | 0.077           | [-0.042, 0.195]  | 1.267   | 0.205     |
| Computer analogy       | Cranial stim (e.g. TMS; tDCS) | -0.130          | [-0.248, -0.012] | -2.151  | 0.032     |
| Mind universal         | Cranial stim (e.g. TMS; tDCS) | 0.272           | [0.154, 0.391]   | 4.513   | <1.42e-04 |
| Social environment     | Cranial stim (e.g. TMS; tDCS) | -0.720          | [-0.838, -0.603] | -12.031 | <1.42e-04 |
| Perception veridical   | Cranial stim (e.g. TMS; tDCS) | -0.102          | [-0.22, 0.017]   | -1.686  | 0.092     |
| Constructs real        | Interviews                    | -0.228          | [-0.273, -0.184] | -10.032 | <1.42e-04 |
| Thinking language      | Interviews                    | 0.116           | [0.071, 0.161]   | 5.081   | <1.42e-04 |
| Math models            | Interviews                    | -0.368          | [-0.412, -0.324] | -16.312 | <1.42e-04 |
| Wide reach             | Interviews                    | -0.072          | [-0.117, -0.027] | -3.137  | 0.002     |
| Rational self-interest | Interviews                    | 0.053           | [0.008, 0.098]   | 2.316   | 0.021     |
| Neurobiology essential | Interviews                    | -0.336          | [-0.38, -0.292]  | -14.857 | <1.42e-04 |
| Holistic view          | Interviews                    | 0.320           | [0.275, 0.364]   | 14.121  | <1.42e-04 |
| Personality stable     | Interviews                    | -0.065          | [-0.11, -0.02]   | -2.835  | 0.005     |
| Context matters        | Interviews                    | 0.154           | [0.109, 0.198]   | 6.723   | <1.42e-04 |
| Capacities innate      | Interviews                    | -0.116          | [-0.16, -0.071]  | -5.055  | <1.42e-04 |
| Ideal rules            | Interviews                    | -0.260          | [-0.304, -0.215] | -11.436 | <1.42e-04 |
| Evolution matters      | Interviews                    | -0.151          | [-0.195, -0.106] | -6.591  | <1.42e-04 |
| Computer analogy       | Interviews                    | -0.076          | [-0.121, -0.031] | -3.314  | 0.001     |
| Mind universal         | Interviews                    | -0.263          | [-0.307, -0.218] | -11.552 | <1.42e-04 |
| Social environment     | Interviews                    | 0.505           | [0.461, 0.548]   | 22.733  | <1.42e-04 |
| Perception veridical   | Interviews                    | -0.006          | [-0.051, 0.039]  | -0.258  | 0.796     |
| Constructs real        | Longitudinal studies          | -0.021          | [-0.07, 0.027]   | -0.868  | 0.386     |
| Thinking language      | Longitudinal studies          | 0.051           | [0.002, 0.099]   | 2.061   | 0.039     |
| Math models            | Longitudinal studies          | -0.027          | [-0.076, 0.021]  | -1.113  | 0.266     |
| Wide reach             | Longitudinal studies          | -0.045          | [-0.093, 0.004]  | -1.814  | 0.070     |
| Rational self-interest | Longitudinal studies          | 0.048           | [0, 0.096]       | 1.965   | 0.049     |
| Neurobiology essential | Longitudinal studies          | -0.106          | [-0.154, -0.058] | -4.306  | <1.42e-04 |
| Holistic view          | Longitudinal studies          | 0.197           | [0.149, 0.245]   | 8.041   | <1.42e-04 |
| Personality stable     | Longitudinal studies          | 0.066           | [0.018, 0.114]   | 2.692   | 0.007     |
| Context matters        | Longitudinal studies          | 0.018           | [-0.03, 0.066]   | 0.738   | 0.460     |
| Capacities innate      | Longitudinal studies          | -0.070          | [-0.118, -0.021] | -2.831  | 0.005     |
| Ideal rules            | Longitudinal studies          | -0.135          | [-0.184, -0.087] | -5.519  | <1.42e-04 |
| Evolution matters      | Longitudinal studies          | -0.096          | [-0.144, -0.048] | -3.919  | <1.42e-04 |
| Computer analogy       | Longitudinal studies          | -0.001          | [-0.049, 0.047]  | -0.044  | 0.965     |
| Mind universal         | Longitudinal studies          | -0.098          | [-0.147, -0.05]  | -4.006  | <1.42e-04 |
| Social environment     | Longitudinal studies          | 0.187           | [0.139, 0.235]   | 7.636   | <1.42e-04 |
| Perception veridical   | Longitudinal studies          | -0.045          | [-0.093, 0.003]  | -1.842  | 0.066     |

Supplementary Table 3: Regression coefficients, research methods (*continued*)

| Theme                  | Research method            | Coefficient (b) | CIs              | t      | p         |
|------------------------|----------------------------|-----------------|------------------|--------|-----------|
| Constructs real        | Behavioral intervention    | -0.015          | [-0.067, 0.037]  | -0.561 | 0.575     |
| Thinking language      | Behavioral intervention    | 0.023           | [-0.029, 0.075]  | 0.859  | 0.390     |
| Math models            | Behavioral intervention    | -0.035          | [-0.087, 0.017]  | -1.310 | 0.190     |
| Wide reach             | Behavioral intervention    | 0.012           | [-0.04, 0.064]   | 0.444  | 0.657     |
| Rational self-interest | Behavioral intervention    | 0.138           | [0.086, 0.191]   | 5.199  | <1.42e-04 |
| Neurobiology essential | Behavioral intervention    | -0.067          | [-0.12, -0.015]  | -2.521 | 0.012     |
| Holistic view          | Behavioral intervention    | 0.108           | [0.056, 0.161]   | 4.063  | <1.42e-04 |
| Personality stable     | Behavioral intervention    | -0.002          | [-0.054, 0.05]   | -0.071 | 0.944     |
| Context matters        | Behavioral intervention    | 0.026           | [-0.027, 0.078]  | 0.964  | 0.335     |
| Capacities innate      | Behavioral intervention    | -0.121          | [-0.173, -0.069] | -4.539 | <1.42e-04 |
| Ideal rules            | Behavioral intervention    | -0.057          | [-0.109, -0.005] | -2.130 | 0.033     |
| Evolution matters      | Behavioral intervention    | -0.049          | [-0.102, 0.003]  | -1.855 | 0.064     |
| Computer analogy       | Behavioral intervention    | 0.012           | [-0.04, 0.064]   | 0.454  | 0.650     |
| Mind universal         | Behavioral intervention    | -0.111          | [-0.163, -0.059] | -4.163 | <1.42e-04 |
| Social environment     | Behavioral intervention    | 0.193           | [0.14, 0.245]    | 7.242  | <1.42e-04 |
| Perception veridical   | Behavioral intervention    | -0.052          | [-0.104, 0.001]  | -1.936 | 0.053     |
| Constructs real        | Twin studies               | 0.217           | [0.052, 0.381]   | 2.587  | 0.010     |
| Thinking language      | Twin studies               | -0.169          | [-0.333, -0.004] | -2.012 | 0.044     |
| Math models            | Twin studies               | 0.188           | [0.024, 0.353]   | 2.247  | 0.025     |
| Wide reach             | Twin studies               | 0.041           | [-0.124, 0.205]  | 0.486  | 0.627     |
| Rational self-interest | Twin studies               | 0.049           | [-0.116, 0.213]  | 0.582  | 0.561     |
| Neurobiology essential | Twin studies               | 0.105           | [-0.06, 0.269]   | 1.249  | 0.212     |
| Holistic view          | Twin studies               | 0.054           | [-0.11, 0.218]   | 0.646  | 0.518     |
| Personality stable     | Twin studies               | 0.348           | [0.184, 0.512]   | 4.160  | <1.42e-04 |
| Context matters        | Twin studies               | -0.314          | [-0.478, -0.15]  | -3.751 | <0.001    |
| Capacities innate      | Twin studies               | 0.350           | [0.186, 0.515]   | 4.186  | <1.42e-04 |
| Ideal rules            | Twin studies               | -0.026          | [-0.191, 0.138]  | -0.314 | 0.754     |
| Evolution matters      | Twin studies               | 0.351           | [0.186, 0.515]   | 4.187  | <1.42e-04 |
| Computer analogy       | Twin studies               | 0.136           | [-0.028, 0.301]  | 1.626  | 0.104     |
| Mind universal         | Twin studies               | 0.013           | [-0.151, 0.178]  | 0.158  | 0.875     |
| Social environment     | Twin studies               | -0.356          | [-0.52, -0.192]  | -4.248 | <1.42e-04 |
| Perception veridical   | Twin studies               | 0.105           | [-0.059, 0.27]   | 1.257  | 0.209     |
| Constructs real        | Self-report/guided writing | -0.039          | [-0.097, 0.019]  | -1.313 | 0.189     |
| Thinking language      | Self-report/guided writing | 0.094           | [0.036, 0.152]   | 3.158  | 0.002     |
| Math models            | Self-report/guided writing | -0.115          | [-0.173, -0.057] | -3.875 | <1.42e-04 |
| Wide reach             | Self-report/guided writing | -0.079          | [-0.137, -0.021] | -2.660 | 0.008     |
| Rational self-interest | Self-report/guided writing | -0.014          | [-0.073, 0.044]  | -0.485 | 0.628     |
| Neurobiology essential | Self-report/guided writing | -0.186          | [-0.244, -0.128] | -6.277 | <1.42e-04 |
| Holistic view          | Self-report/guided writing | 0.165           | [0.107, 0.223]   | 5.568  | <1.42e-04 |
| Personality stable     | Self-report/guided writing | -0.025          | [-0.084, 0.033]  | -0.857 | 0.391     |
| Context matters        | Self-report/guided writing | 0.087           | [0.029, 0.145]   | 2.928  | 0.003     |
| Capacities innate      | Self-report/guided writing | -0.026          | [-0.084, 0.032]  | -0.872 | 0.383     |
| Ideal rules            | Self-report/guided writing | -0.149          | [-0.207, -0.091] | -5.037 | <1.42e-04 |
| Evolution matters      | Self-report/guided writing | -0.093          | [-0.151, -0.035] | -3.129 | 0.002     |

Supplementary Table 3: Regression coefficients, research methods (*continued*)

| Theme                | Research method            | Coefficient (b) | CIs              | t      | p         |
|----------------------|----------------------------|-----------------|------------------|--------|-----------|
| Computer analogy     | Self-report/guided writing | 0.049           | [-0.009, 0.107]  | 1.642  | 0.101     |
| Mind universal       | Self-report/guided writing | -0.160          | [-0.218, -0.102] | -5.398 | <1.42e-04 |
| Social environment   | Self-report/guided writing | 0.288           | [0.231, 0.346]   | 9.782  | <1.42e-04 |
| Perception veridical | Self-report/guided writing | -0.059          | [-0.117, -0.001] | -2.002 | 0.045     |

Supplementary Table 4: Regression coefficients for controversial themes as a function of cognitive traits (each a separate regression model). Results correspond to Fig. 3c in the main text, with a subset also shown in Fig. 2. Regression coefficients ( $\beta$ ) are equivalent to Pearson correlations, as both outcome and predictor have been standardized. P-values in gray reflect cases that failed to meet the Bonferroni-adjusted significance threshold discussed in the main text ( $p < .000223$ ).

| Theme                  | Cognitive trait | Coefficient ( $\beta$ ) | CI               | t      | p         |
|------------------------|-----------------|-------------------------|------------------|--------|-----------|
| Constructs real        | Analytic        | 0.053                   | [0.031, 0.075]   | 4.718  | <2.23e-04 |
| Thinking language      | Analytic        | -0.018                  | [-0.04, 0.004]   | -1.586 | 0.113     |
| Math models            | Analytic        | 0.126                   | [0.104, 0.148]   | 11.342 | <2.23e-04 |
| Wide reach             | Analytic        | 0.046                   | [0.024, 0.068]   | 4.149  | <2.23e-04 |
| Rational self-interest | Analytic        | -0.002                  | [-0.024, 0.02]   | -0.148 | 0.882     |
| Neurobiology essential | Analytic        | 0.007                   | [-0.015, 0.029]  | 0.653  | 0.513     |
| Holistic view          | Analytic        | -0.061                  | [-0.083, -0.039] | -5.422 | <2.23e-04 |
| Personality stable     | Analytic        | 0.035                   | [0.013, 0.056]   | 3.087  | 0.002     |
| Context matters        | Analytic        | -0.042                  | [-0.064, -0.02]  | -3.786 | <2.23e-04 |
| Capacities innate      | Analytic        | 0.050                   | [0.028, 0.072]   | 4.433  | <2.23e-04 |
| Ideal rules            | Analytic        | 0.051                   | [0.029, 0.073]   | 4.560  | <2.23e-04 |
| Evolution matters      | Analytic        | -0.030                  | [-0.052, -0.008] | -2.694 | 0.007     |
| Computer analogy       | Analytic        | 0.031                   | [0.009, 0.053]   | 2.781  | 0.005     |
| Mind universal         | Analytic        | 0.073                   | [0.051, 0.095]   | 6.508  | <2.23e-04 |
| Social environment     | Analytic        | -0.072                  | [-0.094, -0.05]  | -6.478 | <2.23e-04 |
| Perception veridical   | Analytic        | 0.035                   | [0.013, 0.057]   | 3.165  | 0.002     |
| Constructs real        | Creative        | -0.029                  | [-0.051, -0.008] | -2.635 | 0.008     |
| Thinking language      | Creative        | 0.005                   | [-0.017, 0.027]  | 0.439  | 0.661     |
| Math models            | Creative        | -0.061                  | [-0.083, -0.039] | -5.469 | <2.23e-04 |
| Wide reach             | Creative        | 0.010                   | [-0.012, 0.032]  | 0.868  | 0.386     |
| Rational self-interest | Creative        | -0.039                  | [-0.06, -0.017]  | -3.445 | 0.001     |
| Neurobiology essential | Creative        | 0.001                   | [-0.021, 0.023]  | 0.052  | 0.958     |
| Holistic view          | Creative        | 0.053                   | [0.031, 0.075]   | 4.705  | <2.23e-04 |
| Personality stable     | Creative        | -0.078                  | [-0.1, -0.056]   | -6.978 | <2.23e-04 |
| Context matters        | Creative        | 0.057                   | [0.035, 0.079]   | 5.086  | <2.23e-04 |
| Capacities innate      | Creative        | -0.015                  | [-0.037, 0.007]  | -1.370 | 0.171     |
| Ideal rules            | Creative        | -0.029                  | [-0.051, -0.007] | -2.602 | 0.009     |
| Evolution matters      | Creative        | 0.057                   | [0.035, 0.079]   | 5.133  | <2.23e-04 |
| Computer analogy       | Creative        | -0.072                  | [-0.094, -0.05]  | -6.424 | <2.23e-04 |
| Mind universal         | Creative        | -0.041                  | [-0.063, -0.019] | -3.683 | <0.001    |
| Social environment     | Creative        | 0.029                   | [0.007, 0.051]   | 2.576  | 0.010     |
| Perception veridical   | Creative        | -0.002                  | [-0.024, 0.02]   | -0.161 | 0.872     |
| Constructs real        | Practical       | 0.014                   | [-0.008, 0.036]  | 1.285  | 0.199     |
| Thinking language      | Practical       | -0.031                  | [-0.053, -0.009] | -2.777 | 0.006     |
| Math models            | Practical       | -0.010                  | [-0.032, 0.012]  | -0.923 | 0.356     |
| Wide reach             | Practical       | 0.024                   | [0.002, 0.046]   | 2.132  | 0.033     |
| Rational self-interest | Practical       | 0.076                   | [0.055, 0.098]   | 6.846  | <2.23e-04 |
| Neurobiology essential | Practical       | 0.015                   | [-0.007, 0.037]  | 1.363  | 0.173     |
| Holistic view          | Practical       | 0.006                   | [-0.016, 0.028]  | 0.560  | 0.575     |

Supplementary Table 4: Regression coefficients, cognitive traits (*continued*)

| Theme                  | Cognitive trait     | Coefficient ( $\beta$ ) | CIs              | t      | p         |
|------------------------|---------------------|-------------------------|------------------|--------|-----------|
| Personality stable     | Practical           | -0.003                  | [-0.025, 0.019]  | -0.252 | 0.801     |
| Context matters        | Practical           | 0.033                   | [0.011, 0.055]   | 2.951  | 0.003     |
| Capacities innate      | Practical           | -0.042                  | [-0.064, -0.02]  | -3.725 | <2.23e-04 |
| Ideal rules            | Practical           | -0.019                  | [-0.041, 0.003]  | -1.726 | 0.084     |
| Evolution matters      | Practical           | -0.011                  | [-0.033, 0.011]  | -0.980 | 0.327     |
| Computer analogy       | Practical           | 0.000                   | [-0.022, 0.022]  | 0.029  | 0.977     |
| Mind universal         | Practical           | -0.016                  | [-0.038, 0.006]  | -1.398 | 0.162     |
| Social environment     | Practical           | 0.029                   | [0.008, 0.051]   | 2.635  | 0.008     |
| Perception veridical   | Practical           | 0.009                   | [-0.013, 0.031]  | 0.820  | 0.412     |
| Constructs real        | Deliberation        | 0.112                   | [0.09, 0.133]    | 10.031 | <2.23e-04 |
| Thinking language      | Deliberation        | -0.001                  | [-0.023, 0.021]  | -0.077 | 0.939     |
| Math models            | Deliberation        | 0.046                   | [0.024, 0.068]   | 4.145  | <2.23e-04 |
| Wide reach             | Deliberation        | 0.059                   | [0.037, 0.081]   | 5.291  | <2.23e-04 |
| Rational self-interest | Deliberation        | 0.106                   | [0.085, 0.128]   | 9.552  | <2.23e-04 |
| Neurobiology essential | Deliberation        | 0.041                   | [0.019, 0.063]   | 3.664  | <0.001    |
| Holistic view          | Deliberation        | -0.026                  | [-0.048, -0.004] | -2.282 | 0.023     |
| Personality stable     | Deliberation        | 0.124                   | [0.102, 0.146]   | 11.167 | <2.23e-04 |
| Context matters        | Deliberation        | -0.018                  | [-0.04, 0.004]   | -1.642 | 0.101     |
| Capacities innate      | Deliberation        | 0.027                   | [0.006, 0.049]   | 2.454  | 0.014     |
| Ideal rules            | Deliberation        | 0.041                   | [0.019, 0.063]   | 3.697  | <2.23e-04 |
| Evolution matters      | Deliberation        | -0.037                  | [-0.059, -0.015] | -3.291 | 0.001     |
| Computer analogy       | Deliberation        | 0.065                   | [0.043, 0.087]   | 5.799  | <2.23e-04 |
| Mind universal         | Deliberation        | 0.033                   | [0.011, 0.055]   | 2.917  | 0.004     |
| Social environment     | Deliberation        | -0.026                  | [-0.048, -0.005] | -2.365 | 0.018     |
| Perception veridical   | Deliberation        | 0.012                   | [-0.01, 0.034]   | 1.082  | 0.279     |
| Constructs real        | Cognitive structure | 0.115                   | [0.093, 0.137]   | 10.333 | <2.23e-04 |
| Thinking language      | Cognitive structure | -0.005                  | [-0.027, 0.017]  | -0.485 | 0.628     |
| Math models            | Cognitive structure | 0.071                   | [0.049, 0.092]   | 6.313  | <2.23e-04 |
| Wide reach             | Cognitive structure | 0.034                   | [0.012, 0.056]   | 3.054  | 0.002     |
| Rational self-interest | Cognitive structure | 0.136                   | [0.114, 0.158]   | 12.259 | <2.23e-04 |
| Neurobiology essential | Cognitive structure | 0.052                   | [0.03, 0.073]    | 4.610  | <2.23e-04 |
| Holistic view          | Cognitive structure | -0.054                  | [-0.076, -0.032] | -4.796 | <2.23e-04 |
| Personality stable     | Cognitive structure | 0.107                   | [0.085, 0.129]   | 9.599  | <2.23e-04 |
| Context matters        | Cognitive structure | -0.032                  | [-0.054, -0.01]  | -2.878 | 0.004     |
| Capacities innate      | Cognitive structure | 0.038                   | [0.016, 0.06]    | 3.384  | 0.001     |
| Ideal rules            | Cognitive structure | 0.056                   | [0.034, 0.078]   | 4.979  | <2.23e-04 |
| Evolution matters      | Cognitive structure | -0.060                  | [-0.082, -0.038] | -5.387 | <2.23e-04 |
| Computer analogy       | Cognitive structure | 0.095                   | [0.073, 0.117]   | 8.509  | <2.23e-04 |
| Mind universal         | Cognitive structure | 0.042                   | [0.02, 0.064]    | 3.792  | <2.23e-04 |
| Social environment     | Cognitive structure | -0.032                  | [-0.054, -0.01]  | -2.885 | 0.004     |
| Perception veridical   | Cognitive structure | 0.034                   | [0.012, 0.056]   | 3.064  | 0.002     |
| Constructs real        | Aesthetics          | -0.038                  | [-0.06, -0.016]  | -3.400 | 0.001     |
| Thinking language      | Aesthetics          | 0.025                   | [0.003, 0.047]   | 2.201  | 0.028     |
| Math models            | Aesthetics          | -0.054                  | [-0.076, -0.033] | -4.867 | <2.23e-04 |

Supplementary Table 4: Regression coefficients, cognitive traits (*continued*)

| Theme                  | Cognitive trait     | Coefficient ( $\beta$ ) | CIs              | t      | p         |
|------------------------|---------------------|-------------------------|------------------|--------|-----------|
| Wide reach             | Aesthetics          | -0.001                  | [-0.023, 0.021]  | -0.066 | 0.947     |
| Rational self-interest | Aesthetics          | -0.072                  | [-0.094, -0.05]  | -6.478 | <2.23e-04 |
| Neurobiology essential | Aesthetics          | -0.010                  | [-0.032, 0.012]  | -0.926 | 0.355     |
| Holistic view          | Aesthetics          | 0.035                   | [0.013, 0.057]   | 3.161  | 0.002     |
| Personality stable     | Aesthetics          | -0.072                  | [-0.094, -0.051] | -6.485 | <2.23e-04 |
| Context matters        | Aesthetics          | 0.064                   | [0.042, 0.086]   | 5.753  | <2.23e-04 |
| Capacities innate      | Aesthetics          | -0.006                  | [-0.028, 0.016]  | -0.538 | 0.590     |
| Ideal rules            | Aesthetics          | -0.047                  | [-0.069, -0.025] | -4.191 | <2.23e-04 |
| Evolution matters      | Aesthetics          | 0.058                   | [0.036, 0.08]    | 5.180  | <2.23e-04 |
| Computer analogy       | Aesthetics          | -0.056                  | [-0.078, -0.034] | -4.976 | <2.23e-04 |
| Mind universal         | Aesthetics          | -0.024                  | [-0.046, -0.002] | -2.154 | 0.031     |
| Social environment     | Aesthetics          | 0.072                   | [0.05, 0.094]    | 6.470  | <2.23e-04 |
| Perception veridical   | Aesthetics          | -0.009                  | [-0.031, 0.013]  | -0.814 | 0.416     |
| Constructs real        | Breadth of interest | -0.040                  | [-0.062, -0.018] | -3.557 | <0.001    |
| Thinking language      | Breadth of interest | 0.045                   | [0.023, 0.067]   | 4.039  | <2.23e-04 |
| Math models            | Breadth of interest | -0.064                  | [-0.085, -0.042] | -5.681 | <2.23e-04 |
| Wide reach             | Breadth of interest | 0.024                   | [0.002, 0.046]   | 2.173  | 0.030     |
| Rational self-interest | Breadth of interest | -0.096                  | [-0.118, -0.074] | -8.597 | <2.23e-04 |
| Neurobiology essential | Breadth of interest | 0.001                   | [-0.021, 0.023]  | 0.058  | 0.954     |
| Holistic view          | Breadth of interest | 0.045                   | [0.023, 0.067]   | 4.043  | <2.23e-04 |
| Personality stable     | Breadth of interest | -0.055                  | [-0.077, -0.033] | -4.946 | <2.23e-04 |
| Context matters        | Breadth of interest | 0.061                   | [0.039, 0.083]   | 5.441  | <2.23e-04 |
| Capacities innate      | Breadth of interest | 0.000                   | [-0.022, 0.022]  | -0.035 | 0.972     |
| Ideal rules            | Breadth of interest | -0.053                  | [-0.075, -0.031] | -4.768 | <2.23e-04 |
| Evolution matters      | Breadth of interest | 0.063                   | [0.041, 0.085]   | 5.628  | <2.23e-04 |
| Computer analogy       | Breadth of interest | -0.063                  | [-0.085, -0.041] | -5.633 | <2.23e-04 |
| Mind universal         | Breadth of interest | -0.018                  | [-0.04, 0.004]   | -1.568 | 0.117     |
| Social environment     | Breadth of interest | 0.085                   | [0.063, 0.107]   | 7.601  | <2.23e-04 |
| Perception veridical   | Breadth of interest | -0.032                  | [-0.054, -0.01]  | -2.848 | 0.004     |
| Constructs real        | Dominance           | 0.003                   | [-0.019, 0.025]  | 0.241  | 0.809     |
| Thinking language      | Dominance           | -0.014                  | [-0.036, 0.008]  | -1.247 | 0.212     |
| Math models            | Dominance           | -0.010                  | [-0.031, 0.012]  | -0.852 | 0.394     |
| Wide reach             | Dominance           | 0.041                   | [0.019, 0.063]   | 3.662  | <0.001    |
| Rational self-interest | Dominance           | 0.074                   | [0.052, 0.096]   | 6.653  | <2.23e-04 |
| Neurobiology essential | Dominance           | 0.033                   | [0.011, 0.055]   | 2.912  | 0.004     |
| Holistic view          | Dominance           | 0.034                   | [0.012, 0.056]   | 3.022  | 0.003     |
| Personality stable     | Dominance           | 0.004                   | [-0.018, 0.026]  | 0.392  | 0.695     |
| Context matters        | Dominance           | 0.030                   | [0.008, 0.052]   | 2.703  | 0.007     |
| Capacities innate      | Dominance           | -0.033                  | [-0.055, -0.012] | -2.990 | 0.003     |
| Ideal rules            | Dominance           | -0.018                  | [-0.04, 0.004]   | -1.589 | 0.112     |
| Evolution matters      | Dominance           | -0.002                  | [-0.023, 0.02]   | -0.135 | 0.893     |
| Computer analogy       | Dominance           | 0.027                   | [0.005, 0.049]   | 2.396  | 0.017     |
| Mind universal         | Dominance           | -0.023                  | [-0.045, -0.001] | -2.041 | 0.041     |
| Social environment     | Dominance           | 0.037                   | [0.015, 0.059]   | 3.297  | 0.001     |



Supplementary Table 4: Regression coefficients, cognitive traits (*continued*)

| Theme                  | Cognitive trait        | Coefficient ( $\beta$ ) | CIs              | t       | p         |
|------------------------|------------------------|-------------------------|------------------|---------|-----------|
| Perception veridical   | Dominance              | -0.005                  | [-0.027, 0.017]  | -0.440  | 0.660     |
| Constructs real        | Verbal orientation     | -0.019                  | [-0.041, 0.003]  | -1.684  | 0.092     |
| Thinking language      | Verbal orientation     | 0.064                   | [0.042, 0.086]   | 5.706   | <2.23e-04 |
| Math models            | Verbal orientation     | -0.055                  | [-0.077, -0.033] | -4.893  | <2.23e-04 |
| Wide reach             | Verbal orientation     | 0.016                   | [-0.006, 0.038]  | 1.449   | 0.147     |
| Rational self-interest | Verbal orientation     | -0.030                  | [-0.052, -0.008] | -2.652  | 0.008     |
| Neurobiology essential | Verbal orientation     | -0.040                  | [-0.062, -0.018] | -3.557  | <0.001    |
| Holistic view          | Verbal orientation     | 0.057                   | [0.035, 0.079]   | 5.083   | <2.23e-04 |
| Personality stable     | Verbal orientation     | 0.009                   | [-0.013, 0.031]  | 0.797   | 0.426     |
| Context matters        | Verbal orientation     | 0.026                   | [0.004, 0.048]   | 2.340   | 0.019     |
| Capacities innate      | Verbal orientation     | 0.050                   | [0.028, 0.072]   | 4.473   | <2.23e-04 |
| Ideal rules            | Verbal orientation     | -0.038                  | [-0.06, -0.016]  | -3.410  | 0.001     |
| Evolution matters      | Verbal orientation     | -0.021                  | [-0.043, 0.001]  | -1.910  | 0.056     |
| Computer analogy       | Verbal orientation     | -0.018                  | [-0.04, 0.004]   | -1.644  | 0.100     |
| Mind universal         | Verbal orientation     | -0.031                  | [-0.053, -0.009] | -2.808  | 0.005     |
| Social environment     | Verbal orientation     | 0.082                   | [0.06, 0.104]    | 7.328   | <2.23e-04 |
| Perception veridical   | Verbal orientation     | -0.048                  | [-0.07, -0.026]  | -4.269  | <2.23e-04 |
| Constructs real        | Visual orientation     | 0.055                   | [0.033, 0.077]   | 4.933   | <2.23e-04 |
| Thinking language      | Visual orientation     | -0.036                  | [-0.058, -0.015] | -3.258  | 0.001     |
| Math models            | Visual orientation     | 0.097                   | [0.075, 0.119]   | 8.688   | <2.23e-04 |
| Wide reach             | Visual orientation     | 0.015                   | [-0.006, 0.037]  | 1.382   | 0.167     |
| Rational self-interest | Visual orientation     | 0.004                   | [-0.018, 0.026]  | 0.379   | 0.704     |
| Neurobiology essential | Visual orientation     | 0.053                   | [0.031, 0.075]   | 4.761   | <2.23e-04 |
| Holistic view          | Visual orientation     | -0.029                  | [-0.051, -0.007] | -2.615  | 0.009     |
| Personality stable     | Visual orientation     | 0.055                   | [0.033, 0.077]   | 4.953   | <2.23e-04 |
| Context matters        | Visual orientation     | -0.018                  | [-0.04, 0.004]   | -1.578  | 0.115     |
| Capacities innate      | Visual orientation     | 0.060                   | [0.038, 0.082]   | 5.336   | <2.23e-04 |
| Ideal rules            | Visual orientation     | 0.032                   | [0.01, 0.054]    | 2.859   | 0.004     |
| Evolution matters      | Visual orientation     | 0.030                   | [0.008, 0.052]   | 2.683   | 0.007     |
| Computer analogy       | Visual orientation     | 0.020                   | [-0.002, 0.042]  | 1.801   | 0.072     |
| Mind universal         | Visual orientation     | 0.061                   | [0.039, 0.083]   | 5.491   | <2.23e-04 |
| Social environment     | Visual orientation     | -0.009                  | [-0.031, 0.013]  | -0.815  | 0.415     |
| Perception veridical   | Visual orientation     | 0.007                   | [-0.015, 0.029]  | 0.656   | 0.512     |
| Constructs real        | Tolerance of Ambiguity | -0.154                  | [-0.176, -0.132] | -13.926 | <2.23e-04 |
| Thinking language      | Tolerance of Ambiguity | -0.001                  | [-0.023, 0.02]   | -0.132  | 0.895     |
| Math models            | Tolerance of Ambiguity | -0.123                  | [-0.145, -0.101] | -11.084 | <2.23e-04 |
| Wide reach             | Tolerance of Ambiguity | -0.039                  | [-0.061, -0.017] | -3.464  | 0.001     |
| Rational self-interest | Tolerance of Ambiguity | -0.181                  | [-0.202, -0.159] | -16.412 | <2.23e-04 |
| Neurobiology essential | Tolerance of Ambiguity | -0.104                  | [-0.126, -0.082] | -9.332  | <2.23e-04 |
| Holistic view          | Tolerance of Ambiguity | 0.122                   | [0.1, 0.144]     | 10.981  | <2.23e-04 |
| Personality stable     | Tolerance of Ambiguity | -0.097                  | [-0.118, -0.075] | -8.666  | <2.23e-04 |
| Context matters        | Tolerance of Ambiguity | 0.080                   | [0.058, 0.102]   | 7.155   | <2.23e-04 |
| Capacities innate      | Tolerance of Ambiguity | -0.011                  | [-0.033, 0.011]  | -0.943  | 0.346     |
| Ideal rules            | Tolerance of Ambiguity | -0.098                  | [-0.12, -0.076]  | -8.790  | <2.23e-04 |

Supplementary Table 4: Regression coefficients, cognitive traits (*continued*)

| Theme                  | Cognitive trait        | Coefficient ( $\beta$ ) | CIs              | t       | p         |
|------------------------|------------------------|-------------------------|------------------|---------|-----------|
| Evolution matters      | Tolerance of Ambiguity | 0.017                   | [-0.005, 0.039]  | 1.548   | 0.122     |
| Computer analogy       | Tolerance of Ambiguity | -0.132                  | [-0.154, -0.11]  | -11.865 | <2.23e-04 |
| Mind universal         | Tolerance of Ambiguity | -0.069                  | [-0.091, -0.047] | -6.178  | <2.23e-04 |
| Social environment     | Tolerance of Ambiguity | 0.080                   | [0.058, 0.102]   | 7.172   | <2.23e-04 |
| Perception veridical   | Tolerance of Ambiguity | -0.079                  | [-0.101, -0.058] | -7.113  | <2.23e-04 |
| Constructs real        | Object imagery         | 0.019                   | [-0.003, 0.041]  | 1.662   | 0.097     |
| Thinking language      | Object imagery         | -0.032                  | [-0.054, -0.01]  | -2.870  | 0.004     |
| Math models            | Object imagery         | -0.025                  | [-0.047, -0.003] | -2.241  | 0.025     |
| Wide reach             | Object imagery         | 0.000                   | [-0.022, 0.022]  | -0.014  | 0.989     |
| Rational self-interest | Object imagery         | 0.073                   | [0.051, 0.095]   | 6.546   | <2.23e-04 |
| Neurobiology essential | Object imagery         | 0.044                   | [0.022, 0.066]   | 3.947   | <2.23e-04 |
| Holistic view          | Object imagery         | 0.039                   | [0.017, 0.06]    | 3.442   | 0.001     |
| Personality stable     | Object imagery         | 0.006                   | [-0.016, 0.028]  | 0.562   | 0.574     |
| Context matters        | Object imagery         | 0.017                   | [-0.005, 0.039]  | 1.495   | 0.135     |
| Capacities innate      | Object imagery         | -0.018                  | [-0.04, 0.004]   | -1.624  | 0.104     |
| Ideal rules            | Object imagery         | -0.033                  | [-0.054, -0.011] | -2.904  | 0.004     |
| Evolution matters      | Object imagery         | 0.063                   | [0.041, 0.084]   | 5.598   | <2.23e-04 |
| Computer analogy       | Object imagery         | 0.025                   | [0.003, 0.047]   | 2.204   | 0.028     |
| Mind universal         | Object imagery         | -0.052                  | [-0.074, -0.03]  | -4.664  | <2.23e-04 |
| Social environment     | Object imagery         | 0.075                   | [0.053, 0.097]   | 6.727   | <2.23e-04 |
| Perception veridical   | Object imagery         | 0.003                   | [-0.019, 0.025]  | 0.271   | 0.786     |
| Constructs real        | Spatial imagery        | 0.039                   | [0.017, 0.061]   | 3.470   | 0.001     |
| Thinking language      | Spatial imagery        | -0.040                  | [-0.062, -0.018] | -3.601  | <0.001    |
| Math models            | Spatial imagery        | 0.107                   | [0.085, 0.129]   | 9.630   | <2.23e-04 |
| Wide reach             | Spatial imagery        | 0.063                   | [0.041, 0.085]   | 5.625   | <2.23e-04 |
| Rational self-interest | Spatial imagery        | -0.010                  | [-0.031, 0.012]  | -0.850  | 0.396     |
| Neurobiology essential | Spatial imagery        | 0.052                   | [0.03, 0.074]    | 4.669   | <2.23e-04 |
| Holistic view          | Spatial imagery        | -0.055                  | [-0.077, -0.034] | -4.961  | <2.23e-04 |
| Personality stable     | Spatial imagery        | -0.010                  | [-0.032, 0.012]  | -0.895  | 0.371     |
| Context matters        | Spatial imagery        | -0.036                  | [-0.058, -0.014] | -3.250  | 0.001     |
| Capacities innate      | Spatial imagery        | 0.033                   | [0.011, 0.055]   | 2.940   | 0.003     |
| Ideal rules            | Spatial imagery        | 0.040                   | [0.018, 0.062]   | 3.552   | <0.001    |
| Evolution matters      | Spatial imagery        | 0.032                   | [0.01, 0.054]    | 2.827   | 0.005     |
| Computer analogy       | Spatial imagery        | -0.021                  | [-0.043, 0.001]  | -1.895  | 0.058     |
| Mind universal         | Spatial imagery        | 0.055                   | [0.033, 0.077]   | 4.917   | <2.23e-04 |
| Social environment     | Spatial imagery        | -0.078                  | [-0.1, -0.056]   | -6.998  | <2.23e-04 |
| Perception veridical   | Spatial imagery        | 0.027                   | [0.005, 0.049]   | 2.444   | 0.015     |
| Constructs real        | Need for Cognition     | 0.027                   | [0.002, 0.053]   | 2.120   | 0.034     |
| Thinking language      | Need for Cognition     | 0.025                   | [0, 0.05]        | 1.932   | 0.053     |
| Math models            | Need for Cognition     | 0.047                   | [0.021, 0.072]   | 3.615   | <0.001    |
| Wide reach             | Need for Cognition     | 0.038                   | [0.013, 0.063]   | 2.951   | 0.003     |
| Rational self-interest | Need for Cognition     | -0.100                  | [-0.125, -0.075] | -7.840  | <2.23e-04 |
| Neurobiology essential | Need for Cognition     | 0.023                   | [-0.003, 0.048]  | 1.734   | 0.083     |
| Holistic view          | Need for Cognition     | 0.034                   | [0.009, 0.059]   | 2.652   | 0.008     |

Supplementary Table 4: Regression coefficients, cognitive traits (*continued*)

| Theme                | Cognitive trait    | Coefficient ( $\beta$ ) | CI               | t      | p         |
|----------------------|--------------------|-------------------------|------------------|--------|-----------|
| Personality stable   | Need for Cognition | 0.013                   | [-0.012, 0.038]  | 1.007  | 0.314     |
| Context matters      | Need for Cognition | 0.023                   | [-0.003, 0.048]  | 1.767  | 0.077     |
| Capacities innate    | Need for Cognition | 0.058                   | [0.033, 0.083]   | 4.515  | <2.23e-04 |
| Ideal rules          | Need for Cognition | 0.029                   | [0.004, 0.054]   | 2.272  | 0.023     |
| Evolution matters    | Need for Cognition | 0.024                   | [-0.001, 0.049]  | 1.848  | 0.065     |
| Computer analogy     | Need for Cognition | -0.065                  | [-0.09, -0.04]   | -5.114 | <2.23e-04 |
| Mind universal       | Need for Cognition | 0.047                   | [0.022, 0.072]   | 3.666  | <0.001    |
| Social environment   | Need for Cognition | -0.027                  | [-0.052, -0.002] | -2.115 | 0.035     |
| Perception veridical | Need for Cognition | -0.015                  | [-0.04, 0.01]    | -1.178 | 0.239     |

Supplementary Table 5: Regression coefficients for controversial themes as a function of (binary) gender (each a separate regression model). Results correspond to Fig. 3d in the main text. Regression coefficients (b) represent logits, with the outcome (theme) standardized, for ‘gender=male’ compared to the reference level ‘gender = female’. P-values in gray reflect cases that failed to meet the Bonferroni-adjusted significance threshold discussed in the main text ( $p < .00313$ ). See <https://osf.io/zyec9/> for further results including nonbinary participants.

| Theme                  | Gender (binary) | Coefficient (b) | CI               | t       | p         |
|------------------------|-----------------|-----------------|------------------|---------|-----------|
| Constructs real        | male            | 0.145           | [0.101, 0.189]   | 6.443   | <3.13e-03 |
| Thinking language      | male            | -0.024          | [-0.069, 0.02]   | -1.082  | 0.279     |
| Math models            | male            | 0.285           | [0.241, 0.329]   | 12.733  | <3.13e-03 |
| Wide reach             | male            | 0.074           | [0.029, 0.118]   | 3.265   | 0.001     |
| Rational self-interest | male            | -0.174          | [-0.218, -0.13]  | -7.729  | <3.13e-03 |
| Neurobiology essential | male            | 0.024           | [-0.02, 0.068]   | 1.065   | 0.287     |
| Holistic view          | male            | -0.206          | [-0.25, -0.162]  | -9.181  | <3.13e-03 |
| Personality stable     | male            | 0.020           | [-0.025, 0.064]  | 0.872   | 0.383     |
| Context matters        | male            | -0.077          | [-0.121, -0.033] | -3.411  | 0.001     |
| Capacities innate      | male            | 0.103           | [0.059, 0.148]   | 4.583   | <3.13e-03 |
| Ideal rules            | male            | 0.159           | [0.115, 0.203]   | 7.047   | <3.13e-03 |
| Evolution matters      | male            | 0.250           | [0.206, 0.294]   | 11.132  | <3.13e-03 |
| Computer analogy       | male            | -0.114          | [-0.158, -0.07]  | -5.044  | <3.13e-03 |
| Mind universal         | male            | 0.219           | [0.174, 0.263]   | 9.727   | <3.13e-03 |
| Social environment     | male            | -0.321          | [-0.365, -0.277] | -14.381 | <3.13e-03 |
| Perception veridical   | male            | 0.135           | [0.091, 0.179]   | 5.986   | <3.13e-03 |

Supplementary Table 6: Regression coefficients for research areas as a function of research methods. Results correspond to Extended Data Figure 4. Regression coefficients (b) represent logits. P-values in gray reflect cases that failed to meet the Bonferroni-adjusted significance threshold discussed in the caption of Extended Data Figure 4 ( $p < .000152$ ).

| Research area            | Research method            | Coefficient (b) | CI               | t       | p         |
|--------------------------|----------------------------|-----------------|------------------|---------|-----------|
| Biopsych                 | Behav expt: typical adults | 0.029           | [0.016, 0.041]   | 4.457   | <1.52e-04 |
| Clinical/health psych    | Behav expt: typical adults | -0.135          | [-0.155, -0.116] | -13.791 | <1.52e-04 |
| Cog neurosci             | Behav expt: typical adults | 0.177           | [0.161, 0.193]   | 21.689  | <1.52e-04 |
| Cognitive psych          | Behav expt: typical adults | 0.336           | [0.318, 0.355]   | 35.644  | <1.52e-04 |
| Comparative/animal behav | Behav expt: typical adults | 0.003           | [-0.006, 0.011]  | 0.618   | 0.536     |
| Counseling               | Behav expt: typical adults | -0.080          | [-0.09, -0.069]  | -14.400 | <1.52e-04 |
| Developmental psych      | Behav expt: typical adults | -0.096          | [-0.114, -0.079] | -10.637 | <1.52e-04 |
| Educational psych        | Behav expt: typical adults | -0.073          | [-0.087, -0.059] | -10.144 | <1.52e-04 |
| Evolutionary psych       | Behav expt: typical adults | 0.017           | [0.006, 0.027]   | 3.129   | 0.002     |
| Forensic psych           | Behav expt: typical adults | -0.011          | [-0.02, -0.003]  | -2.563  | 0.010     |
| Neuropsych               | Behav expt: typical adults | 0.030           | [0.016, 0.043]   | 4.281   | <1.52e-04 |
| Occupational/IO psych    | Behav expt: typical adults | -0.016          | [-0.028, -0.003] | -2.435  | 0.015     |
| Psychometrics            | Behav expt: typical adults | -0.024          | [-0.038, -0.009] | -3.258  | 0.001     |
| Social psych             | Behav expt: typical adults | 0.074           | [0.054, 0.093]   | 7.484   | <1.52e-04 |
| Personality psych        | Behav expt: typical adults | -0.012          | [-0.023, -0.001] | -2.152  | 0.031     |
| Biopsych                 | Behav expt: children       | 0.011           | [-0.006, 0.027]  | 1.287   | 0.198     |
| Clinical/health psych    | Behav expt: children       | -0.043          | [-0.068, -0.017] | -3.287  | 0.001     |
| Cog neurosci             | Behav expt: children       | 0.068           | [0.046, 0.089]   | 6.159   | <1.52e-04 |
| Cognitive psych          | Behav expt: children       | 0.178           | [0.152, 0.203]   | 13.538  | <1.52e-04 |
| Comparative/animal behav | Behav expt: children       | 0.016           | [0.006, 0.027]   | 3.021   | 0.003     |
| Counseling               | Behav expt: children       | -0.044          | [-0.059, -0.03]  | -6.081  | <1.52e-04 |
| Developmental psych      | Behav expt: children       | 0.490           | [0.469, 0.511]   | 46.229  | <1.52e-04 |
| Educational psych        | Behav expt: children       | 0.137           | [0.118, 0.155]   | 14.605  | <1.52e-04 |
| Evolutionary psych       | Behav expt: children       | 0.007           | [-0.007, 0.02]   | 0.938   | 0.348     |
| Forensic psych           | Behav expt: children       | -0.025          | [-0.036, -0.013] | -4.245  | <1.52e-04 |
| Neuropsych               | Behav expt: children       | 0.042           | [0.024, 0.059]   | 4.614   | <1.52e-04 |
| Occupational/IO psych    | Behav expt: children       | -0.089          | [-0.105, -0.073] | -10.689 | <1.52e-04 |
| Psychometrics            | Behav expt: children       | -0.026          | [-0.045, -0.008] | -2.772  | 0.006     |
| Social psych             | Behav expt: children       | -0.135          | [-0.16, -0.11]   | -10.528 | <1.52e-04 |
| Personality psych        | Behav expt: children       | -0.045          | [-0.06, -0.031]  | -6.214  | <1.52e-04 |
| Biopsych                 | Behav expt: atypical pop   | 0.084           | [0.068, 0.1]     | 10.483  | <1.52e-04 |
| Clinical/health psych    | Behav expt: atypical pop   | 0.150           | [0.126, 0.174]   | 12.065  | <1.52e-04 |
| Cog neurosci             | Behav expt: atypical pop   | 0.267           | [0.247, 0.287]   | 26.161  | <1.52e-04 |
| Cognitive psych          | Behav expt: atypical pop   | 0.177           | [0.153, 0.202]   | 14.011  | <1.52e-04 |
| Comparative/animal behav | Behav expt: atypical pop   | 0.001           | [-0.009, 0.011]  | 0.196   | 0.844     |
| Counseling               | Behav expt: atypical pop   | -0.034          | [-0.048, -0.02]  | -4.855  | <1.52e-04 |
| Developmental psych      | Behav expt: atypical pop   | 0.059           | [0.037, 0.082]   | 5.156   | <1.52e-04 |
| Educational psych        | Behav expt: atypical pop   | -0.016          | [-0.034, 0.002]  | -1.756  | 0.079     |
| Evolutionary psych       | Behav expt: atypical pop   | -0.014          | [-0.027, -0.001] | -2.094  | 0.036     |
| Forensic psych           | Behav expt: atypical pop   | 0.003           | [-0.008, 0.014]  | 0.557   | 0.577     |
| Neuropsych               | Behav expt: atypical pop   | 0.199           | [0.183, 0.216]   | 23.638  | <1.52e-04 |

Supplementary Table 6: Regression coefficients, research areas methods (*continued*)

| Research area            | Research method           | Coefficient (b) | CIs              | t       | p         |
|--------------------------|---------------------------|-----------------|------------------|---------|-----------|
| Occupational/IO psych    | Behav expt: atypical pop  | -0.074          | [-0.09, -0.059]  | -9.234  | <1.52e-04 |
| Psychometrics            | Behav expt: atypical pop  | 0.005           | [-0.013, 0.023]  | 0.592   | 0.554     |
| Social psych             | Behav expt: atypical pop  | -0.153          | [-0.177, -0.129] | -12.381 | <1.52e-04 |
| Personality psych        | Behav expt: atypical pop  | -0.028          | [-0.042, -0.014] | -3.964  | <1.52e-04 |
| Biopsych                 | Behav expt: animals       | 0.371           | [0.345, 0.397]   | 28.146  | <1.52e-04 |
| Clinical/health psych    | Behav expt: animals       | -0.134          | [-0.176, -0.092] | -6.281  | <1.52e-04 |
| Cog neurosci             | Behav expt: animals       | 0.134           | [0.099, 0.17]    | 7.419   | <1.52e-04 |
| Cognitive psych          | Behav expt: animals       | -0.045          | [-0.088, -0.002] | -2.058  | 0.040     |
| Comparative/animal behav | Behav expt: animals       | 0.437           | [0.423, 0.452]   | 58.133  | <1.52e-04 |
| Counseling               | Behav expt: animals       | -0.062          | [-0.085, -0.038] | -5.114  | <1.52e-04 |
| Developmental psych      | Behav expt: animals       | -0.015          | [-0.054, 0.023]  | -0.768  | 0.443     |
| Educational psych        | Behav expt: animals       | -0.088          | [-0.119, -0.058] | -5.676  | <1.52e-04 |
| Evolutionary psych       | Behav expt: animals       | 0.182           | [0.16, 0.204]    | 16.143  | <1.52e-04 |
| Forensic psych           | Behav expt: animals       | -0.022          | [-0.041, -0.003] | -2.321  | 0.020     |
| Neuropsych               | Behav expt: animals       | 0.116           | [0.087, 0.145]   | 7.810   | <1.52e-04 |
| Occupational/IO psych    | Behav expt: animals       | -0.075          | [-0.102, -0.048] | -5.408  | <1.52e-04 |
| Psychometrics            | Behav expt: animals       | -0.053          | [-0.084, -0.022] | -3.389  | 0.001     |
| Social psych             | Behav expt: animals       | -0.179          | [-0.221, -0.138] | -8.459  | <1.52e-04 |
| Personality psych        | Behav expt: animals       | -0.041          | [-0.064, -0.017] | -3.377  | 0.001     |
| Biopsych                 | Electrophys (EEG/ERP)     | 0.184           | [0.165, 0.202]   | 19.925  | <1.52e-04 |
| Clinical/health psych    | Electrophys (EEG/ERP)     | -0.033          | [-0.062, -0.005] | -2.274  | 0.023     |
| Cog neurosci             | Electrophys (EEG/ERP)     | 0.491           | [0.47, 0.513]    | 44.229  | <1.52e-04 |
| Cognitive psych          | Electrophys (EEG/ERP)     | 0.238           | [0.21, 0.267]    | 16.208  | <1.52e-04 |
| Comparative/animal behav | Electrophys (EEG/ERP)     | 0.002           | [-0.01, 0.014]   | 0.351   | 0.726     |
| Counseling               | Electrophys (EEG/ERP)     | -0.044          | [-0.061, -0.028] | -5.406  | <1.52e-04 |
| Developmental psych      | Electrophys (EEG/ERP)     | -0.015          | [-0.041, 0.012]  | -1.087  | 0.277     |
| Educational psych        | Electrophys (EEG/ERP)     | -0.061          | [-0.081, -0.04]  | -5.689  | <1.52e-04 |
| Evolutionary psych       | Electrophys (EEG/ERP)     | -0.002          | [-0.018, 0.013]  | -0.300  | 0.764     |
| Forensic psych           | Electrophys (EEG/ERP)     | -0.019          | [-0.031, -0.006] | -2.854  | 0.004     |
| Neuropsych               | Electrophys (EEG/ERP)     | 0.186           | [0.167, 0.206]   | 18.745  | <1.52e-04 |
| Occupational/IO psych    | Electrophys (EEG/ERP)     | -0.076          | [-0.094, -0.057] | -8.045  | <1.52e-04 |
| Psychometrics            | Electrophys (EEG/ERP)     | -0.003          | [-0.024, 0.018]  | -0.280  | 0.780     |
| Social psych             | Electrophys (EEG/ERP)     | -0.141          | [-0.169, -0.112] | -9.731  | <1.52e-04 |
| Personality psych        | Electrophys (EEG/ERP)     | -0.025          | [-0.041, -0.009] | -3.036  | 0.002     |
| Biopsych                 | Electrophys (single cell) | 0.412           | [0.36, 0.464]    | 15.548  | <1.52e-04 |
| Clinical/health psych    | Electrophys (single cell) | -0.159          | [-0.24, -0.077]  | -3.810  | <1.52e-04 |
| Cog neurosci             | Electrophys (single cell) | 0.463           | [0.394, 0.531]   | 13.246  | <1.52e-04 |
| Cognitive psych          | Electrophys (single cell) | 0.016           | [-0.067, 0.099]  | 0.375   | 0.707     |
| Comparative/animal behav | Electrophys (single cell) | 0.211           | [0.177, 0.245]   | 12.169  | <1.52e-04 |
| Counseling               | Electrophys (single cell) | -0.059          | [-0.105, -0.013] | -2.516  | 0.012     |
| Developmental psych      | Electrophys (single cell) | -0.107          | [-0.182, -0.032] | -2.799  | 0.005     |
| Educational psych        | Electrophys (single cell) | -0.076          | [-0.136, -0.017] | -2.509  | 0.012     |
| Evolutionary psych       | Electrophys (single cell) | -0.016          | [-0.06, 0.027]   | -0.735  | 0.463     |
| Forensic psych           | Electrophys (single cell) | -0.041          | [-0.078, -0.005] | -2.224  | 0.026     |

Supplementary Table 6: Regression coefficients, research areas methods (*continued*)

| Research area            | Research method           | Coefficient (b) | CIs              | t       | p         |
|--------------------------|---------------------------|-----------------|------------------|---------|-----------|
| Neuropsych               | Electrophys (single cell) | 0.227           | [0.171, 0.284]   | 7.889   | <1.52e-04 |
| Occupational/IO psych    | Electrophys (single cell) | -0.065          | [-0.118, -0.012] | -2.418  | 0.016     |
| Psychometrics            | Electrophys (single cell) | -0.043          | [-0.103, 0.017]  | -1.402  | 0.161     |
| Social psych             | Electrophys (single cell) | -0.188          | [-0.269, -0.107] | -4.545  | <1.52e-04 |
| Personality psych        | Electrophys (single cell) | -0.050          | [-0.096, -0.004] | -2.143  | 0.032     |
| Biopsych                 | Neuroimaging              | 0.172           | [0.154, 0.19]    | 18.605  | <1.52e-04 |
| Clinical/health psych    | Neuroimaging              | 0.025           | [-0.004, 0.054]  | 1.709   | 0.088     |
| Cog neurosci             | Neuroimaging              | 0.608           | [0.588, 0.628]   | 58.624  | <1.52e-04 |
| Cognitive psych          | Neuroimaging              | 0.146           | [0.117, 0.175]   | 9.795   | <1.52e-04 |
| Comparative/animal behav | Neuroimaging              | 0.016           | [0.004, 0.028]   | 2.672   | 0.008     |
| Counseling               | Neuroimaging              | -0.055          | [-0.071, -0.039] | -6.723  | <1.52e-04 |
| Developmental psych      | Neuroimaging              | -0.029          | [-0.056, -0.003] | -2.190  | 0.029     |
| Educational psych        | Neuroimaging              | -0.078          | [-0.099, -0.057] | -7.316  | <1.52e-04 |
| Evolutionary psych       | Neuroimaging              | -0.004          | [-0.02, 0.011]   | -0.562  | 0.574     |
| Forensic psych           | Neuroimaging              | -0.024          | [-0.037, -0.011] | -3.680  | <0.001    |
| Neuropsych               | Neuroimaging              | 0.258           | [0.239, 0.277]   | 26.433  | <1.52e-04 |
| Occupational/IO psych    | Neuroimaging              | -0.083          | [-0.102, -0.065] | -8.848  | <1.52e-04 |
| Psychometrics            | Neuroimaging              | -0.034          | [-0.055, -0.013] | -3.198  | 0.001     |
| Social psych             | Neuroimaging              | -0.173          | [-0.201, -0.145] | -11.997 | <1.52e-04 |
| Personality psych        | Neuroimaging              | -0.033          | [-0.049, -0.016] | -3.947  | <1.52e-04 |
| Biopsych                 | Observational Studies     | -0.010          | [-0.023, 0.003]  | -1.488  | 0.137     |
| Clinical/health psych    | Observational Studies     | 0.079           | [0.058, 0.099]   | 7.549   | <1.52e-04 |
| Cog neurosci             | Observational Studies     | -0.112          | [-0.129, -0.095] | -12.709 | <1.52e-04 |
| Cognitive psych          | Observational Studies     | -0.105          | [-0.126, -0.084] | -9.865  | <1.52e-04 |
| Comparative/animal behav | Observational Studies     | 0.008           | [-0.001, 0.017]  | 1.791   | 0.073     |
| Counseling               | Observational Studies     | 0.007           | [-0.004, 0.019]  | 1.266   | 0.205     |
| Developmental psych      | Observational Studies     | 0.128           | [0.109, 0.146]   | 13.397  | <1.52e-04 |
| Educational psych        | Observational Studies     | 0.080           | [0.065, 0.095]   | 10.520  | <1.52e-04 |
| Evolutionary psych       | Observational Studies     | 0.016           | [0.005, 0.027]   | 2.802   | 0.005     |
| Forensic psych           | Observational Studies     | 0.005           | [-0.005, 0.014]  | 0.982   | 0.326     |
| Neuropsych               | Observational Studies     | -0.009          | [-0.023, 0.005]  | -1.232  | 0.218     |
| Occupational/IO psych    | Observational Studies     | 0.025           | [0.012, 0.038]   | 3.665   | <0.001    |
| Psychometrics            | Observational Studies     | 0.053           | [0.038, 0.068]   | 6.947   | <1.52e-04 |
| Social psych             | Observational Studies     | 0.047           | [0.026, 0.067]   | 4.481   | <1.52e-04 |
| Personality psych        | Observational Studies     | 0.004           | [-0.007, 0.016]  | 0.760   | 0.447     |
| Biopsych                 | Comp ling/corpus analysis | -0.052          | [-0.078, -0.026] | -3.970  | <1.52e-04 |
| Clinical/health psych    | Comp ling/corpus analysis | -0.191          | [-0.231, -0.152] | -9.461  | <1.52e-04 |
| Cog neurosci             | Comp ling/corpus analysis | 0.032           | [-0.001, 0.066]  | 1.874   | 0.061     |
| Cognitive psych          | Comp ling/corpus analysis | 0.323           | [0.283, 0.363]   | 15.821  | <1.52e-04 |
| Comparative/animal behav | Comp ling/corpus analysis | -0.011          | [-0.028, 0.006]  | -1.295  | 0.195     |
| Counseling               | Comp ling/corpus analysis | -0.046          | [-0.069, -0.024] | -4.044  | <1.52e-04 |
| Developmental psych      | Comp ling/corpus analysis | 0.007           | [-0.03, 0.043]   | 0.359   | 0.719     |
| Educational psych        | Comp ling/corpus analysis | -0.028          | [-0.057, 0.001]  | -1.889  | 0.059     |
| Evolutionary psych       | Comp ling/corpus analysis | -0.001          | [-0.022, 0.021]  | -0.063  | 0.950     |

Supplementary Table 6: Regression coefficients, research areas methods (*continued*)

| Research area            | Research method           | Coefficient (b) | CIs              | t       | p         |
|--------------------------|---------------------------|-----------------|------------------|---------|-----------|
| Forensic psych           | Comp ling/corpus analysis | -0.018          | [-0.036, 0]      | -2.015  | 0.044     |
| Neuropsych               | Comp ling/corpus analysis | -0.011          | [-0.038, 0.017]  | -0.754  | 0.451     |
| Occupational/IO psych    | Comp ling/corpus analysis | -0.023          | [-0.049, 0.003]  | -1.744  | 0.081     |
| Psychometrics            | Comp ling/corpus analysis | 0.003           | [-0.026, 0.033]  | 0.232   | 0.817     |
| Social psych             | Comp ling/corpus analysis | -0.034          | [-0.073, 0.006]  | -1.671  | 0.095     |
| Personality psych        | Comp ling/corpus analysis | -0.036          | [-0.058, -0.013] | -3.134  | 0.002     |
| Biopsych                 | Comp/math modeling        | 0.020           | [0.004, 0.037]   | 2.421   | 0.016     |
| Clinical/health psych    | Comp/math modeling        | -0.134          | [-0.159, -0.108] | -10.320 | <1.52e-04 |
| Cog neurosci             | Comp/math modeling        | 0.143           | [0.122, 0.165]   | 13.094  | <1.52e-04 |
| Cognitive psych          | Comp/math modeling        | 0.241           | [0.216, 0.267]   | 18.491  | <1.52e-04 |
| Comparative/animal behav | Comp/math modeling        | 0.019           | [0.009, 0.03]    | 3.568   | <0.001    |
| Counseling               | Comp/math modeling        | -0.050          | [-0.064, -0.036] | -6.842  | <1.52e-04 |
| Developmental psych      | Comp/math modeling        | -0.072          | [-0.095, -0.048] | -6.004  | <1.52e-04 |
| Educational psych        | Comp/math modeling        | -0.020          | [-0.038, -0.001] | -2.059  | 0.040     |
| Evolutionary psych       | Comp/math modeling        | 0.012           | [-0.001, 0.026]  | 1.767   | 0.077     |
| Forensic psych           | Comp/math modeling        | -0.012          | [-0.024, -0.001] | -2.104  | 0.035     |
| Neuropsych               | Comp/math modeling        | 0.007           | [-0.011, 0.024]  | 0.728   | 0.467     |
| Occupational/IO psych    | Comp/math modeling        | 0.003           | [-0.014, 0.019]  | 0.329   | 0.742     |
| Psychometrics            | Comp/math modeling        | 0.117           | [0.098, 0.136]   | 12.347  | <1.52e-04 |
| Social psych             | Comp/math modeling        | -0.060          | [-0.085, -0.035] | -4.631  | <1.52e-04 |
| Personality psych        | Comp/math modeling        | -0.016          | [-0.03, -0.001]  | -2.136  | 0.033     |
| Biopsych                 | Clin intervention         | 0.031           | [0.015, 0.047]   | 3.872   | <1.52e-04 |
| Clinical/health psych    | Clin intervention         | 0.557           | [0.536, 0.578]   | 51.027  | <1.52e-04 |
| Cog neurosci             | Clin intervention         | -0.036          | [-0.057, -0.015] | -3.392  | 0.001     |
| Cognitive psych          | Clin intervention         | -0.193          | [-0.218, -0.169] | -15.280 | <1.52e-04 |
| Comparative/animal behav | Clin intervention         | -0.027          | [-0.037, -0.017] | -5.100  | <1.52e-04 |
| Counseling               | Clin intervention         | 0.132           | [0.119, 0.146]   | 19.107  | <1.52e-04 |
| Developmental psych      | Clin intervention         | 0.018           | [-0.005, 0.04]   | 1.518   | 0.129     |
| Educational psych        | Clin intervention         | -0.039          | [-0.057, -0.022] | -4.310  | <1.52e-04 |
| Evolutionary psych       | Clin intervention         | -0.025          | [-0.038, -0.012] | -3.719  | <0.001    |
| Forensic psych           | Clin intervention         | 0.042           | [0.031, 0.053]   | 7.519   | <1.52e-04 |
| Neuropsych               | Clin intervention         | 0.080           | [0.063, 0.097]   | 9.231   | <1.52e-04 |
| Occupational/IO psych    | Clin intervention         | -0.056          | [-0.072, -0.041] | -6.977  | <1.52e-04 |
| Psychometrics            | Clin intervention         | 0.030           | [0.012, 0.048]   | 3.290   | 0.001     |
| Social psych             | Clin intervention         | -0.129          | [-0.154, -0.105] | -10.421 | <1.52e-04 |
| Personality psych        | Clin intervention         | 0.009           | [-0.005, 0.023]  | 1.306   | 0.192     |
| Biopsych                 | Case study                | -0.051          | [-0.067, -0.035] | -6.390  | <1.52e-04 |
| Clinical/health psych    | Case study                | 0.104           | [0.08, 0.128]    | 8.397   | <1.52e-04 |
| Cog neurosci             | Case study                | -0.075          | [-0.096, -0.055] | -7.164  | <1.52e-04 |
| Cognitive psych          | Case study                | -0.106          | [-0.131, -0.081] | -8.395  | <1.52e-04 |
| Comparative/animal behav | Case study                | -0.020          | [-0.031, -0.01]  | -3.932  | <1.52e-04 |
| Counseling               | Case study                | 0.127           | [0.113, 0.14]    | 18.519  | <1.52e-04 |
| Developmental psych      | Case study                | 0.014           | [-0.008, 0.037]  | 1.249   | 0.212     |
| Educational psych        | Case study                | 0.095           | [0.078, 0.113]   | 10.600  | <1.52e-04 |



Supplementary Table 6: Regression coefficients, research areas methods (*continued*)

| Research area            | Research method    | Coefficient (b) | CIs              | t       | p         |
|--------------------------|--------------------|-----------------|------------------|---------|-----------|
| Evolutionary psych       | Case study         | -0.012          | [-0.025, 0.001]  | -1.751  | 0.080     |
| Forensic psych           | Case study         | 0.047           | [0.036, 0.057]   | 8.459   | <1.52e-04 |
| Neuropsych               | Case study         | 0.036           | [0.019, 0.053]   | 4.186   | <1.52e-04 |
| Occupational/IO psych    | Case study         | 0.062           | [0.047, 0.078]   | 7.809   | <1.52e-04 |
| Psychometrics            | Case study         | -0.015          | [-0.033, 0.003]  | -1.615  | 0.106     |
| Social psych             | Case study         | 0.018           | [-0.006, 0.042]  | 1.460   | 0.144     |
| Personality psych        | Case study         | 0.003           | [-0.011, 0.016]  | 0.386   | 0.700     |
| Biopsych                 | Surveys            | -0.075          | [-0.087, -0.062] | -11.611 | <1.52e-04 |
| Clinical/health psych    | Surveys            | 0.084           | [0.064, 0.104]   | 8.385   | <1.52e-04 |
| Cog neurosci             | Surveys            | -0.214          | [-0.23, -0.198]  | -26.164 | <1.52e-04 |
| Cognitive psych          | Surveys            | -0.192          | [-0.212, -0.173] | -19.150 | <1.52e-04 |
| Comparative/animal behav | Surveys            | -0.043          | [-0.051, -0.035] | -10.239 | <1.52e-04 |
| Counseling               | Surveys            | 0.020           | [0.009, 0.031]   | 3.579   | <0.001    |
| Developmental psych      | Surveys            | -0.005          | [-0.023, 0.013]  | -0.517  | 0.605     |
| Educational psych        | Surveys            | 0.050           | [0.035, 0.064]   | 6.779   | <1.52e-04 |
| Evolutionary psych       | Surveys            | -0.018          | [-0.029, -0.008] | -3.373  | 0.001     |
| Forensic psych           | Surveys            | 0.006           | [-0.003, 0.015]  | 1.335   | 0.182     |
| Neuropsych               | Surveys            | -0.094          | [-0.108, -0.081] | -13.623 | <1.52e-04 |
| Occupational/IO psych    | Surveys            | 0.102           | [0.089, 0.114]   | 15.942  | <1.52e-04 |
| Psychometrics            | Surveys            | 0.069           | [0.055, 0.084]   | 9.462   | <1.52e-04 |
| Social psych             | Surveys            | 0.216           | [0.197, 0.235]   | 22.267  | <1.52e-04 |
| Personality psych        | Surveys            | 0.058           | [0.047, 0.069]   | 10.294  | <1.52e-04 |
| Biopsych                 | Meta-analyses      | -0.005          | [-0.021, 0.012]  | -0.563  | 0.574     |
| Clinical/health psych    | Meta-analyses      | 0.078           | [0.053, 0.103]   | 6.069   | <1.52e-04 |
| Cog neurosci             | Meta-analyses      | -0.020          | [-0.041, 0.001]  | -1.848  | 0.065     |
| Cognitive psych          | Meta-analyses      | -0.059          | [-0.084, -0.033] | -4.489  | <1.52e-04 |
| Comparative/animal behav | Meta-analyses      | -0.017          | [-0.028, -0.007] | -3.188  | 0.001     |
| Counseling               | Meta-analyses      | 0.005           | [-0.009, 0.019]  | 0.718   | 0.473     |
| Developmental psych      | Meta-analyses      | -0.021          | [-0.044, 0.002]  | -1.776  | 0.076     |
| Educational psych        | Meta-analyses      | 0.025           | [0.006, 0.043]   | 2.650   | 0.008     |
| Evolutionary psych       | Meta-analyses      | -0.003          | [-0.017, 0.01]   | -0.508  | 0.611     |
| Forensic psych           | Meta-analyses      | 0.016           | [0.005, 0.028]   | 2.866   | 0.004     |
| Neuropsych               | Meta-analyses      | 0.002           | [-0.015, 0.02]   | 0.242   | 0.809     |
| Occupational/IO psych    | Meta-analyses      | 0.054           | [0.038, 0.071]   | 6.590   | <1.52e-04 |
| Psychometrics            | Meta-analyses      | 0.073           | [0.055, 0.092]   | 7.819   | <1.52e-04 |
| Social psych             | Meta-analyses      | 0.038           | [0.013, 0.063]   | 3.001   | 0.003     |
| Personality psych        | Meta-analyses      | 0.028           | [0.013, 0.042]   | 3.824   | <1.52e-04 |
| Biopsych                 | Pharm intervention | 0.356           | [0.328, 0.385]   | 24.649  | <1.52e-04 |
| Clinical/health psych    | Pharm intervention | 0.220           | [0.175, 0.266]   | 9.518   | <1.52e-04 |
| Cog neurosci             | Pharm intervention | 0.206           | [0.168, 0.245]   | 10.534  | <1.52e-04 |
| Cognitive psych          | Pharm intervention | -0.135          | [-0.182, -0.089] | -5.710  | <1.52e-04 |
| Comparative/animal behav | Pharm intervention | 0.130           | [0.111, 0.149]   | 13.486  | <1.52e-04 |
| Counseling               | Pharm intervention | -0.001          | [-0.027, 0.024]  | -0.113  | 0.910     |
| Developmental psych      | Pharm intervention | -0.102          | [-0.144, -0.06]  | -4.791  | <1.52e-04 |

Supplementary Table 6: Regression coefficients, research areas methods (*continued*)

| Research area            | Research method               | Coefficient (b) | CIs              | t       | p         |
|--------------------------|-------------------------------|-----------------|------------------|---------|-----------|
| Educational psych        | Pharm intervention            | -0.091          | [-0.125, -0.058] | -5.408  | <1.52e-04 |
| Evolutionary psych       | Pharm intervention            | 0.006           | [-0.018, 0.03]   | 0.497   | 0.619     |
| Forensic psych           | Pharm intervention            | 0.007           | [-0.013, 0.027]  | 0.658   | 0.511     |
| Neuropsych               | Pharm intervention            | 0.218           | [0.187, 0.25]    | 13.671  | <1.52e-04 |
| Occupational/IO psych    | Pharm intervention            | -0.064          | [-0.094, -0.035] | -4.297  | <1.52e-04 |
| Psychometrics            | Pharm intervention            | -0.003          | [-0.036, 0.031]  | -0.168  | 0.867     |
| Social psych             | Pharm intervention            | -0.194          | [-0.239, -0.149] | -8.443  | <1.52e-04 |
| Personality psych        | Pharm intervention            | -0.024          | [-0.049, 0.002]  | -1.801  | 0.072     |
| Biopsych                 | Eye-tracking                  | 0.029           | [0.011, 0.047]   | 3.132   | 0.002     |
| Clinical/health psych    | Eye-tracking                  | -0.157          | [-0.185, -0.129] | -10.934 | <1.52e-04 |
| Cog neurosci             | Eye-tracking                  | 0.265           | [0.242, 0.289]   | 22.367  | <1.52e-04 |
| Cognitive psych          | Eye-tracking                  | 0.378           | [0.35, 0.406]    | 26.757  | <1.52e-04 |
| Comparative/animal behav | Eye-tracking                  | -0.001          | [-0.013, 0.011]  | -0.224  | 0.823     |
| Counseling               | Eye-tracking                  | -0.064          | [-0.08, -0.048]  | -7.872  | <1.52e-04 |
| Developmental psych      | Eye-tracking                  | 0.028           | [0.002, 0.054]   | 2.096   | 0.036     |
| Educational psych        | Eye-tracking                  | -0.036          | [-0.056, -0.015] | -3.403  | 0.001     |
| Evolutionary psych       | Eye-tracking                  | -0.016          | [-0.031, -0.001] | -2.095  | 0.036     |
| Forensic psych           | Eye-tracking                  | -0.022          | [-0.034, -0.009] | -3.380  | 0.001     |
| Neuropsych               | Eye-tracking                  | 0.048           | [0.029, 0.068]   | 4.829   | <1.52e-04 |
| Occupational/IO psych    | Eye-tracking                  | -0.057          | [-0.075, -0.039] | -6.119  | <1.52e-04 |
| Psychometrics            | Eye-tracking                  | -0.020          | [-0.041, 0.001]  | -1.897  | 0.058     |
| Social psych             | Eye-tracking                  | -0.109          | [-0.137, -0.081] | -7.666  | <1.52e-04 |
| Personality psych        | Eye-tracking                  | -0.048          | [-0.064, -0.032] | -5.913  | <1.52e-04 |
| Biopsych                 | Cranial stim (e.g. TMS; tDCS) | 0.217           | [0.184, 0.251]   | 12.684  | <1.52e-04 |
| Clinical/health psych    | Cranial stim (e.g. TMS; tDCS) | -0.046          | [-0.098, 0.007]  | -1.704  | 0.088     |
| Cog neurosci             | Cranial stim (e.g. TMS; tDCS) | 0.652           | [0.61, 0.694]    | 30.336  | <1.52e-04 |
| Cognitive psych          | Cranial stim (e.g. TMS; tDCS) | 0.245           | [0.191, 0.298]   | 8.984   | <1.52e-04 |
| Comparative/animal behav | Cranial stim (e.g. TMS; tDCS) | 0.014           | [-0.008, 0.036]  | 1.239   | 0.215     |
| Counseling               | Cranial stim (e.g. TMS; tDCS) | -0.051          | [-0.081, -0.021] | -3.386  | 0.001     |
| Developmental psych      | Cranial stim (e.g. TMS; tDCS) | -0.101          | [-0.149, -0.053] | -4.098  | <1.52e-04 |
| Educational psych        | Cranial stim (e.g. TMS; tDCS) | -0.079          | [-0.117, -0.041] | -4.053  | <1.52e-04 |
| Evolutionary psych       | Cranial stim (e.g. TMS; tDCS) | -0.011          | [-0.039, 0.017]  | -0.745  | 0.456     |
| Forensic psych           | Cranial stim (e.g. TMS; tDCS) | -0.020          | [-0.044, 0.003]  | -1.696  | 0.090     |
| Neuropsych               | Cranial stim (e.g. TMS; tDCS) | 0.306           | [0.27, 0.342]    | 16.723  | <1.52e-04 |
| Occupational/IO psych    | Cranial stim (e.g. TMS; tDCS) | -0.075          | [-0.109, -0.041] | -4.353  | <1.52e-04 |
| Psychometrics            | Cranial stim (e.g. TMS; tDCS) | -0.041          | [-0.08, -0.002]  | -2.085  | 0.037     |
| Social psych             | Cranial stim (e.g. TMS; tDCS) | -0.178          | [-0.23, -0.126]  | -6.713  | <1.52e-04 |
| Personality psych        | Cranial stim (e.g. TMS; tDCS) | -0.040          | [-0.07, -0.011]  | -2.665  | 0.008     |
| Biopsych                 | Interviews                    | -0.070          | [-0.083, -0.058] | -10.803 | <1.52e-04 |
| Clinical/health psych    | Interviews                    | 0.164           | [0.144, 0.183]   | 16.350  | <1.52e-04 |
| Cog neurosci             | Interviews                    | -0.171          | [-0.187, -0.154] | -20.349 | <1.52e-04 |
| Cognitive psych          | Interviews                    | -0.207          | [-0.227, -0.188] | -20.488 | <1.52e-04 |
| Comparative/animal behav | Interviews                    | -0.038          | [-0.046, -0.029] | -8.896  | <1.52e-04 |
| Counseling               | Interviews                    | 0.073           | [0.062, 0.084]   | 12.853  | <1.52e-04 |

Supplementary Table 6: Regression coefficients, research areas methods (*continued*)

| Research area            | Research method         | Coefficient (b) | CIs              | t       | p         |
|--------------------------|-------------------------|-----------------|------------------|---------|-----------|
| Developmental psych      | Interviews              | 0.060           | [0.042, 0.078]   | 6.423   | <1.52e-04 |
| Educational psych        | Interviews              | 0.080           | [0.065, 0.094]   | 10.862  | <1.52e-04 |
| Evolutionary psych       | Interviews              | -0.028          | [-0.039, -0.017] | -5.180  | <1.52e-04 |
| Forensic psych           | Interviews              | 0.035           | [0.026, 0.044]   | 7.822   | <1.52e-04 |
| Neuropsych               | Interviews              | -0.053          | [-0.066, -0.039] | -7.477  | <1.52e-04 |
| Occupational/IO psych    | Interviews              | 0.074           | [0.061, 0.087]   | 11.393  | <1.52e-04 |
| Psychometrics            | Interviews              | 0.010           | [-0.004, 0.025]  | 1.394   | 0.163     |
| Social psych             | Interviews              | 0.117           | [0.098, 0.137]   | 11.718  | <1.52e-04 |
| Personality psych        | Interviews              | 0.016           | [0.005, 0.027]   | 2.778   | 0.005     |
| Biopsych                 | Longitudinal studies    | 0.000           | [-0.014, 0.013]  | -0.060  | 0.952     |
| Clinical/health psych    | Longitudinal studies    | 0.103           | [0.082, 0.124]   | 9.516   | <1.52e-04 |
| Cog neurosci             | Longitudinal studies    | -0.059          | [-0.077, -0.041] | -6.412  | <1.52e-04 |
| Cognitive psych          | Longitudinal studies    | -0.146          | [-0.168, -0.125] | -13.284 | <1.52e-04 |
| Comparative/animal behav | Longitudinal studies    | -0.022          | [-0.031, -0.013] | -4.771  | <1.52e-04 |
| Counseling               | Longitudinal studies    | -0.020          | [-0.032, -0.008] | -3.312  | 0.001     |
| Developmental psych      | Longitudinal studies    | 0.192           | [0.173, 0.212]   | 19.681  | <1.52e-04 |
| Educational psych        | Longitudinal studies    | 0.041           | [0.026, 0.057]   | 5.203   | <1.52e-04 |
| Evolutionary psych       | Longitudinal studies    | -0.022          | [-0.033, -0.01]  | -3.699  | <0.001    |
| Forensic psych           | Longitudinal studies    | -0.014          | [-0.024, -0.005] | -2.891  | 0.004     |
| Neuropsych               | Longitudinal studies    | 0.013           | [-0.001, 0.028]  | 1.763   | 0.078     |
| Occupational/IO psych    | Longitudinal studies    | 0.041           | [0.027, 0.055]   | 5.823   | <1.52e-04 |
| Psychometrics            | Longitudinal studies    | 0.072           | [0.057, 0.088]   | 9.076   | <1.52e-04 |
| Social psych             | Longitudinal studies    | 0.033           | [0.012, 0.054]   | 3.065   | 0.002     |
| Personality psych        | Longitudinal studies    | 0.039           | [0.027, 0.051]   | 6.317   | <1.52e-04 |
| Biopsych                 | Behavioral intervention | 0.037           | [0.022, 0.052]   | 4.878   | <1.52e-04 |
| Clinical/health psych    | Behavioral intervention | 0.269           | [0.247, 0.292]   | 23.528  | <1.52e-04 |
| Cog neurosci             | Behavioral intervention | -0.061          | [-0.081, -0.042] | -6.114  | <1.52e-04 |
| Cognitive psych          | Behavioral intervention | -0.117          | [-0.141, -0.094] | -9.744  | <1.52e-04 |
| Comparative/animal behav | Behavioral intervention | -0.010          | [-0.02, 0]       | -2.055  | 0.040     |
| Counseling               | Behavioral intervention | 0.025           | [0.012, 0.038]   | 3.770   | <0.001    |
| Developmental psych      | Behavioral intervention | 0.035           | [0.014, 0.056]   | 3.205   | 0.001     |
| Educational psych        | Behavioral intervention | 0.044           | [0.027, 0.061]   | 5.139   | <1.52e-04 |
| Evolutionary psych       | Behavioral intervention | -0.027          | [-0.039, -0.014] | -4.229  | <1.52e-04 |
| Forensic psych           | Behavioral intervention | 0.004           | [-0.006, 0.015]  | 0.811   | 0.418     |
| Neuropsych               | Behavioral intervention | 0.029           | [0.013, 0.045]   | 3.513   | <0.001    |
| Occupational/IO psych    | Behavioral intervention | 0.015           | [0, 0.03]        | 1.936   | 0.053     |
| Psychometrics            | Behavioral intervention | 0.026           | [0.009, 0.043]   | 2.993   | 0.003     |
| Social psych             | Behavioral intervention | -0.013          | [-0.036, 0.01]   | -1.068  | 0.286     |
| Personality psych        | Behavioral intervention | -0.006          | [-0.019, 0.007]  | -0.850  | 0.395     |
| Biopsych                 | Twin studies            | 0.126           | [0.079, 0.173]   | 5.270   | <1.52e-04 |
| Clinical/health psych    | Twin studies            | 0.056           | [-0.017, 0.129]  | 1.499   | 0.134     |
| Cog neurosci             | Twin studies            | -0.012          | [-0.074, 0.05]   | -0.374  | 0.708     |
| Cognitive psych          | Twin studies            | -0.069          | [-0.144, 0.005]  | -1.822  | 0.069     |
| Comparative/animal behav | Twin studies            | 0.020           | [-0.011, 0.05]   | 1.261   | 0.207     |

Supplementary Table 6: Regression coefficients, research areas methods (*continued*)

| Research area            | Research method            | Coefficient (b) | CIs              | t      | p         |
|--------------------------|----------------------------|-----------------|------------------|--------|-----------|
| Counseling               | Twin studies               | -0.033          | [-0.074, 0.008]  | -1.575 | 0.115     |
| Developmental psych      | Twin studies               | 0.222           | [0.155, 0.289]   | 6.515  | <1.52e-04 |
| Educational psych        | Twin studies               | 0.020           | [-0.033, 0.073]  | 0.730  | 0.466     |
| Evolutionary psych       | Twin studies               | 0.157           | [0.118, 0.196]   | 7.948  | <1.52e-04 |
| Forensic psych           | Twin studies               | 0.001           | [-0.032, 0.033]  | 0.046  | 0.964     |
| Neuropsych               | Twin studies               | 0.039           | [-0.011, 0.09]   | 1.522  | 0.128     |
| Occupational/IO psych    | Twin studies               | -0.043          | [-0.09, 0.004]   | -1.778 | 0.075     |
| Psychometrics            | Twin studies               | 0.151           | [0.098, 0.205]   | 5.550  | <1.52e-04 |
| Social psych             | Twin studies               | -0.065          | [-0.137, 0.008]  | -1.749 | 0.080     |
| Personality psych        | Twin studies               | 0.135           | [0.095, 0.176]   | 6.483  | <1.52e-04 |
| Biopsych                 | Self-report/guided writing | -0.022          | [-0.038, -0.005] | -2.547 | 0.011     |
| Clinical/health psych    | Self-report/guided writing | 0.105           | [0.08, 0.131]    | 8.041  | <1.52e-04 |
| Cog neurosci             | Self-report/guided writing | -0.094          | [-0.116, -0.072] | -8.468 | <1.52e-04 |
| Cognitive psych          | Self-report/guided writing | -0.124          | [-0.15, -0.097]  | -9.245 | <1.52e-04 |
| Comparative/animal behav | Self-report/guided writing | -0.028          | [-0.039, -0.018] | -5.156 | <1.52e-04 |
| Counseling               | Self-report/guided writing | 0.056           | [0.041, 0.07]    | 7.523  | <1.52e-04 |
| Developmental psych      | Self-report/guided writing | 0.043           | [0.019, 0.066]   | 3.548  | <0.001    |
| Educational psych        | Self-report/guided writing | 0.071           | [0.053, 0.09]    | 7.470  | <1.52e-04 |
| Evolutionary psych       | Self-report/guided writing | -0.003          | [-0.016, 0.011]  | -0.358 | 0.720     |
| Forensic psych           | Self-report/guided writing | 0.005           | [-0.007, 0.016]  | 0.776  | 0.438     |
| Neuropsych               | Self-report/guided writing | -0.033          | [-0.05, -0.015]  | -3.560 | <0.001    |
| Occupational/IO psych    | Self-report/guided writing | 0.041           | [0.024, 0.057]   | 4.778  | <1.52e-04 |
| Psychometrics            | Self-report/guided writing | 0.054           | [0.035, 0.073]   | 5.602  | <1.52e-04 |
| Social psych             | Self-report/guided writing | 0.159           | [0.134, 0.185]   | 12.306 | <1.52e-04 |
| Personality psych        | Self-report/guided writing | 0.097           | [0.082, 0.111]   | 13.186 | <1.52e-04 |

Supplementary Table 7: Regression coefficients for each latent theme factor as a function of select cognitive traits, corresponding to Fig. 6b in the main text. Each latent factor outcome represents one model with multiple predictors. Regression coefficients (beta) reflect outcomes and predictors all having been standardized.

| Latent factor | Cognitive trait        | Coefficient ( $\beta$ ) | CIs              | t       | p       |
|---------------|------------------------|-------------------------|------------------|---------|---------|
| 1: Essential  | Tolerance of Ambiguity | -0.133                  | [-0.183, -0.084] | -5.245  | < 0.001 |
| 1: Essential  | Need for Cognition     | 0.139                   | [0.094, 0.184]   | 6.068   | < 0.001 |
| 1: Essential  | Verbal orientation     | -0.007                  | [-0.045, 0.032]  | -0.344  | 0.731   |
| 1: Essential  | Spatial imagery        | 0.012                   | [-0.007, 0.03]   | 1.226   | 0.220   |
| 1: Essential  | Cognitive structure    | 0.001                   | [-0.032, 0.034]  | 0.084   | 0.933   |
| 1: Essential  | Breadth of interest    | -0.036                  | [-0.066, -0.006] | -2.378  | 0.017   |
| 2: Biological | Tolerance of Ambiguity | -0.232                  | [-0.283, -0.181] | -8.940  | < 0.001 |
| 2: Biological | Need for Cognition     | 0.104                   | [0.058, 0.15]    | 4.455   | < 0.001 |
| 2: Biological | Verbal orientation     | -0.097                  | [-0.136, -0.058] | -4.872  | < 0.001 |
| 2: Biological | Spatial imagery        | 0.041                   | [0.022, 0.06]    | 4.205   | < 0.001 |
| 2: Biological | Cognitive structure    | -0.004                  | [-0.037, 0.03]   | -0.228  | 0.820   |
| 2: Biological | Breadth of interest    | 0.045                   | [0.014, 0.075]   | 2.898   | 0.004   |
| 3: Logical    | Tolerance of Ambiguity | -0.276                  | [-0.323, -0.229] | -11.551 | < 0.001 |
| 3: Logical    | Need for Cognition     | -0.069                  | [-0.111, -0.027] | -3.197  | 0.001   |
| 3: Logical    | Verbal orientation     | -0.010                  | [-0.046, 0.026]  | -0.544  | 0.587   |
| 3: Logical    | Spatial imagery        | 0.028                   | [0.01, 0.045]    | 3.104   | 0.002   |
| 3: Logical    | Cognitive structure    | 0.120                   | [0.089, 0.151]   | 7.570   | < 0.001 |
| 3: Logical    | Breadth of interest    | -0.041                  | [-0.068, -0.013] | -2.863  | 0.004   |
| 4: Contextual | Tolerance of Ambiguity | 0.346                   | [0.289, 0.404]   | 11.798  | < 0.001 |
| 4: Contextual | Need for Cognition     | -0.130                  | [-0.182, -0.078] | -4.915  | < 0.001 |
| 4: Contextual | Verbal orientation     | 0.136                   | [0.091, 0.18]    | 6.007   | < 0.001 |
| 4: Contextual | Spatial imagery        | -0.086                  | [-0.108, -0.065] | -7.856  | < 0.001 |
| 4: Contextual | Cognitive structure    | -0.026                  | [-0.064, 0.012]  | -1.355  | 0.176   |
| 4: Contextual | Breadth of interest    | 0.080                   | [0.046, 0.114]   | 4.594   | < 0.001 |
| 5: Objective  | Tolerance of Ambiguity | -0.401                  | [-0.454, -0.348] | -14.784 | < 0.001 |
| 5: Objective  | Need for Cognition     | 0.191                   | [0.143, 0.239]   | 7.844   | < 0.001 |
| 5: Objective  | Verbal orientation     | -0.138                  | [-0.179, -0.097] | -6.611  | < 0.001 |
| 5: Objective  | Spatial imagery        | 0.076                   | [0.056, 0.096]   | 7.506   | < 0.001 |
| 5: Objective  | Cognitive structure    | 0.019                   | [-0.016, 0.054]  | 1.055   | 0.291   |
| 5: Objective  | Breadth of interest    | -0.034                  | [-0.065, -0.002] | -2.093  | 0.036   |

### **Appendix 3 Additional details on the bibliometric models**

To create the input for the semantics model, we first concatenated the title and the abstract of each article. Then, we used spaCy (<https://spacy.io/>) library to tokenize the words in each article. Words that were classified as punctuation or number by the tokenizer were thrown out. We also removed the stop words included in the spaCy model. Finally, a bigram detector implemented in Gensim<sup>1</sup> package (the phrases module) was trained on the whole corpus and was applied to the corpus. We used the distributed memory training algorithm for the Doc2vec<sup>2</sup> algorithm. All hyperparameters were identical to the default value in the Gensim package, except that we used 128 dimensions for the vector space (this was to match the citation and the co-authorship models). For the citation and co-authorship networks, we removed the self-loops in the network. We used the Node2vec<sup>3</sup> algorithm implemented in <https://github.com/eliorc/node2vec> with all hyperparameters set as default in the implementation.

## Appendix 4 Structural equation models

In addition to the linear regressions reported in the main text, we report two Structural Equation Models (SEMs) that encompass multiple relationships between the variables. In the model summaries below, ‘topic’ refers to surveyed research topics; ‘trait’ refers to cognitive traits; ‘branch’ to research area; ‘controversy’ to controversial themes; ‘method’ to research methods; ‘coauthor’ to the bibliometric model of co-authorship; ‘semantics’ to the bibliometric model of abstract texts; and ‘citations’ to the bibliometric model of citation practices.

The first SEM, which includes semantic similarity but not citation similarity, is specified as:

$$\begin{aligned} \text{topic} &\sim \text{trait} \\ \text{branch} &\sim \text{trait} + \text{topic} \\ \text{method} &\sim \text{trait} + \text{branch} \\ \text{coauthor} &\sim \text{trait} + \text{topic} + \text{branch} + \text{method} \\ \text{controversy} &\sim \text{trait} + \text{topic} + \text{branch} + \text{method} \\ \text{semantics} &\sim \text{trait} + \text{topic} + \text{branch} + \text{method} + \text{coauthor} + \text{controversy} \end{aligned}$$

Supplementary Table 8 and Supplementary Figure 1 below show the results from the first SEM.

The second SEM, which includes citation similarity but not semantic similarity, is specified as:

$$\begin{aligned} \text{topic} &\sim \text{trait} \\ \text{branch} &\sim \text{trait} + \text{topic} \\ \text{method} &\sim \text{trait} + \text{branch} \\ \text{coauthor} &\sim \text{trait} + \text{topic} + \text{branch} + \text{method} \\ \text{controversy} &\sim \text{trait} + \text{topic} + \text{branch} + \text{method} \\ \text{citations} &\sim \text{trait} + \text{topic} + \text{branch} + \text{method} + \text{coauthor} + \text{controversy} \end{aligned}$$

Supplementary Table 9 and Supplementary Figure 2 below show the results from the second SEM.

Supplementary Table 8: Structural Equation Model 1 Results

| DV          | IV          | Estimate | Std. Err. | z-value  | p-value | 95% CI           |
|-------------|-------------|----------|-----------|----------|---------|------------------|
| topic       | trait       | 0.008    | < 0.001   | 31.149   | < 0.001 | [0.007, 0.008]   |
| branch      | trait       | 0.009    | < 0.001   | 35.789   | < 0.001 | [0.008, 0.009]   |
| branch      | topic       | 0.153    | < 0.001   | 761.663  | < 0.001 | [0.153, 0.154]   |
| method      | trait       | 0.029    | < 0.001   | 128.438  | < 0.001 | [0.028, 0.029]   |
| method      | branch      | 0.236    | < 0.001   | 1245.784 | < 0.001 | [0.235, 0.236]   |
| coauthor    | trait       | -0.002   | < 0.001   | -8.692   | < 0.001 | [-0.002, -0.001] |
| coauthor    | topic       | 0.038    | < 0.001   | 203.614  | < 0.001 | [0.038, 0.038]   |
| coauthor    | branch      | 0.115    | < 0.001   | 589.162  | < 0.001 | [0.114, 0.115]   |
| coauthor    | method      | 0.069    | < 0.001   | 338.707  | < 0.001 | [0.069, 0.069]   |
| controversy | trait       | 0.089    | < 0.001   | 432.632  | < 0.001 | [0.088, 0.089]   |
| controversy | topic       | 0.003    | < 0.001   | 16.647   | < 0.001 | [0.003, 0.003]   |
| controversy | branch      | 0.025    | < 0.001   | 136.407  | < 0.001 | [0.025, 0.025]   |
| controversy | method      | 0.068    | < 0.001   | 353.805  | < 0.001 | [0.067, 0.068]   |
| semantics   | trait       | 0.006    | < 0.001   | 32.560   | < 0.001 | [0.006, 0.007]   |
| semantics   | topic       | 0.053    | < 0.001   | 328.737  | < 0.001 | [0.052, 0.053]   |
| semantics   | branch      | 0.106    | < 0.001   | 633.113  | < 0.001 | [0.106, 0.107]   |
| semantics   | method      | 0.092    | < 0.001   | 521.997  | < 0.001 | [0.091, 0.092]   |
| semantics   | coauthor    | 0.025    | < 0.001   | 142.990  | < 0.001 | [0.025, 0.026]   |
| semantics   | controversy | 0.027    | < 0.001   | 141.096  | < 0.001 | [0.026, 0.027]   |



Supplementary Figure 1: Structural Equation Model 1 Results

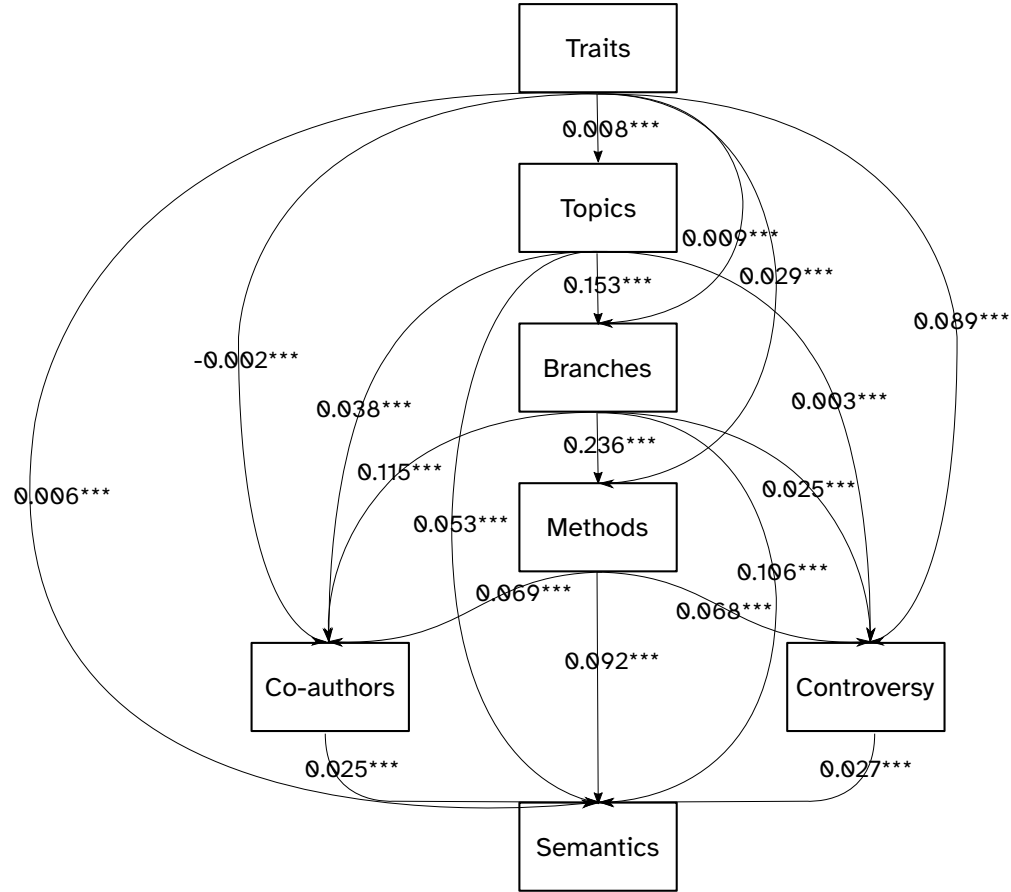

Pathways from the first SEM above (cf. Supplementary Table 8). \*  $p < 0.05$ , \*\*  $p < 0.01$ , \*\*\*  $p < 0.001$ , all two-sided and based on z-statistics.

Supplementary Table 9: Structural Equation Model 2 Results

| DV          | IV          | Estimate | Std. Err. | z-value  | p-value | 95% CI           |
|-------------|-------------|----------|-----------|----------|---------|------------------|
| topic       | trait       | 0.008    | < 0.001   | 35.271   | < 0.001 | [0.008, 0.009]   |
| branch      | trait       | 0.009    | < 0.001   | 38.569   | < 0.001 | [0.008, 0.009]   |
| branch      | topic       | 0.153    | < 0.001   | 795.646  | < 0.001 | [0.152, 0.153]   |
| method      | trait       | 0.027    | < 0.001   | 129.963  | < 0.001 | [0.027, 0.028]   |
| method      | branch      | 0.233    | < 0.001   | 1295.369 | < 0.001 | [0.233, 0.234]   |
| coauthor    | trait       | -0.002   | < 0.001   | -8.166   | < 0.001 | [-0.002, -0.001] |
| coauthor    | topic       | 0.036    | < 0.001   | 203.939  | < 0.001 | [0.036, 0.036]   |
| coauthor    | branch      | 0.110    | < 0.001   | 595.699  | < 0.001 | [0.109, 0.11]    |
| coauthor    | method      | 0.069    | < 0.001   | 358.666  | < 0.001 | [0.069, 0.07]    |
| controversy | trait       | 0.086    | < 0.001   | 442.016  | < 0.001 | [0.086, 0.087]   |
| controversy | topic       | 0.003    | < 0.001   | 19.514   | < 0.001 | [0.003, 0.004]   |
| controversy | branch      | 0.024    | < 0.001   | 140.615  | < 0.001 | [0.024, 0.025]   |
| controversy | method      | 0.070    | < 0.001   | 385.947  | < 0.001 | [0.07, 0.07]     |
| citations   | trait       | -0.010   | < 0.001   | -50.519  | < 0.001 | [-0.01, -0.009]  |
| citations   | topic       | 0.110    | < 0.001   | 670.254  | < 0.001 | [0.11, 0.111]    |
| citations   | branch      | 0.290    | < 0.001   | 1684.131 | < 0.001 | [0.29, 0.291]    |
| citations   | method      | 0.253    | < 0.001   | 1400.533 | < 0.001 | [0.252, 0.253]   |
| citations   | coauthor    | 0.179    | < 0.001   | 980.932  | < 0.001 | [0.179, 0.179]   |
| citations   | controversy | 0.024    | < 0.001   | 121.177  | < 0.001 | [0.023, 0.024]   |

Supplementary Figure 2: Structural Equation Model 2 Results

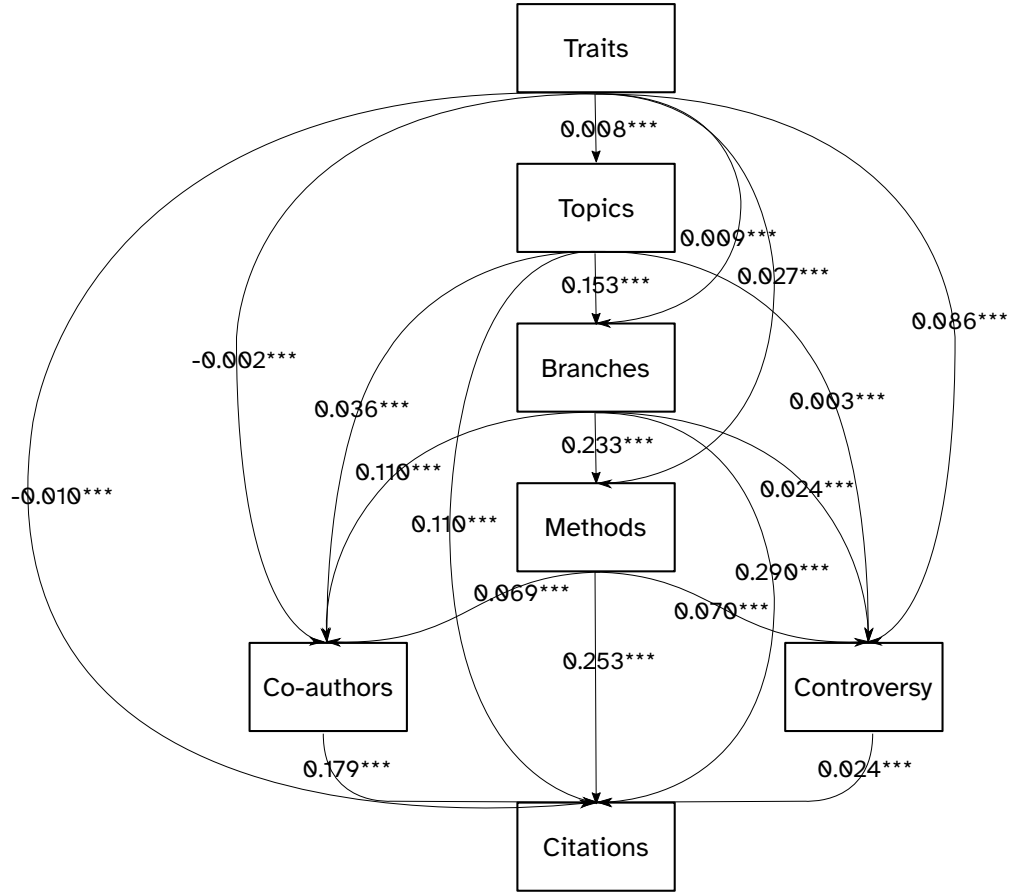

Pathways from the second SEM above (cf. Supplementary Table 9). \*  $p < 0.05$ , \*\*  $p < 0.01$ , \*\*\*  $p < 0.001$ , all two-sided and based on z-statistics.

## Appendix 5 Robustness checks

With a large-enough sample size, even random noise could pass conventional thresholds for significance. While we stress that we do not rely on a conventional  $p < 0.05$  threshold anywhere in the main text (and indeed use much smaller Bonferroni-corrected thresholds such as  $p < 0.000208$  in main text Figure 3a,  $p < 0.000142$  in Figure 3b and  $p < 0.000223$  in Figure 3c, all two-tailed), we ran additional analyses to assess the extent to which reported effects may have reflected the large sample size.

To do so, we drew random samples from our data for simulated sample sizes ranging from 300 to 3000 in multiples of 300. For each simulated sample size in this range, we repeatedly drew random samples and re-ran benchmark analyses on each of those samples, assessing the stability of effects across simulated sample sizes.

For the benchmarks, we focused on one of our main findings: the association between cognitive measure Tolerance for Ambiguity and numerous controversial themes (Figure 3c). We selected the largest effect in that column (Tolerance for Ambiguity~Rational self-interest:  $r = -0.18$ ), the smallest effect in that column that passed the Bonferroni-adjusted cutoff (Tolerance for Ambiguity~Mind universal:  $r = -0.07$ ), and an effect numerically intermediate between these extremes (Tolerance for Ambiguity~Holistic view:  $r = 0.12$ ).

We repeated the sampling procedure 1000 times for each simulated sample size, each time tracking the size and direction of the correlation coefficient for each of these benchmark associations, as well as whether it passed the conventional  $p < 0.05$  threshold. Each panel in Supplementary Figure 3 focuses on one of these associations. The top half of each panel plots the median correlation coefficient across all 1000 simulations for each sample size, as well as indicating the central 95% of values (2.5% to 97.5%) with a ribbon. The bottom half of each panel plots how often the association was significant for each simulated sample size.

The larger  $r = -0.18$  effect was remarkably stable across the whole range of simulated sample sizes, and the intermediate  $r = 0.12$  effect lay above 0 in over 95% of samples even at the smallest simulated sample size, where we would be more likely to find a significant effect than not. Even for the smallest  $r = -0.07$  effect, our sample size would have had to drop below 1000 (almost an eighth of the actual size) before 0 lies within 95% of simulated effects, or for it to be more likely that we find a non-significant effect.

Thus, it is not the case that we are only finding such effects because we had almost 8000 respondents. In the Discussion, we further address why anything more than small effects would be implausible for this topic.

Supplementary Figure 3: Effect sizes across a range of simulated sample sizes for select controversial themes as a function of cognitive trait ‘tolerance of ambiguity’.

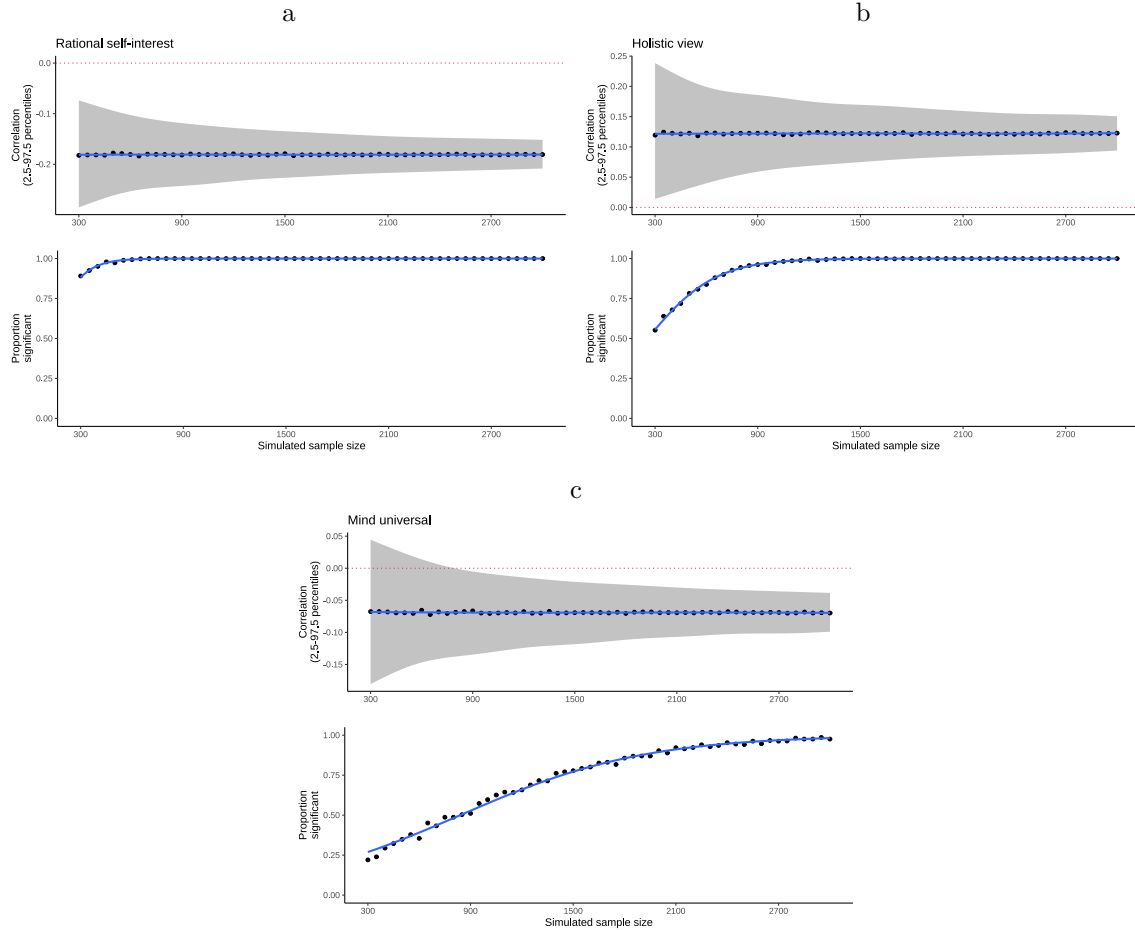

Plots of the effect sizes (top) and the proportion of samples with a significant effect (bottom) across associations between Tolerance for Ambiguity and three benchmark controversial themes: (a) Rational self-interest; (b) Holistic view; and (c) Mind universal. For the plots of effect size, the dots show the median across 1000 random samples for a given simulated sample size, the blue fit lines represent a (Loess) smooth of those medians, and the while the grey ribbons show the central 95% of the distribution. For the plots of significance, the dots simply show what proportion of the 1000 samples had a significant effect at the conventional  $p < 0.05$  level, with the blue fit line reflecting a (Loess) smooth of those medians.

## References

- [1] Radim Řehůřek and Petr Sojka. Software Framework for Topic Modelling with Large Corpora. In *Proceedings of the LREC 2010 Workshop on New Challenges for NLP Frameworks*, pages 45–50, Valletta, Malta, May 2010. ELRA. <http://is.muni.cz/publication/884893/en>.
- [2] Tomas Mikolov, Ilya Sutskever, Kai Chen, Greg Corrado, and Jeffrey Dean. Distributed representations of words and phrases and their compositionality. In *Proceedings of the 26th International Conference on Neural Information Processing Systems*, pages 3111–3119, 2013.
- [3] Aditya Grover and Jure Leskovec. Node2vec: Scalable feature learning for networks. In *Proceedings of the 22nd ACM SIGKDD International Conference on Knowledge Discovery and Data Mining*, KDD '16, pages 855–864, New York, NY, USA, 2016. Association for Computing Machinery. ISBN 9781450342322. doi: 10.1145/2939672.2939754. URL <https://doi.org/10.1145/2939672.2939754>.
